## **Modulation of adult-born neuron excitability by coupling to GABAergic networks**

Sung M. Yang\*, Ayelén I. Groisman\* and Alejandro F. Schinder

(\* ) Equally contributing authors

Laboratorio de Plasticidad Neuronal

Fundación Instituto Leloir

Av. Patricias Argentinas 435

C1405BWE – Buenos Aires

Argentina

**Short title:** Circuit remodeling by new dentate granule cells

Correspondence should be addressed to: [aschinder@leloir.org.ar](mailto:aschinder@leloir.org.ar)

## **ABSTRACT**

New granule cells (GCs) are generated in the hippocampus of adult mammals including humans. These neurons grow in a rather silent network governed by inhibition, but they are initially hyperexcitable because they are uncoupled from the dominant GABAergic tone. The precise timing and synaptic mechanisms that control the excitability of new GCs remain unclear. To build an accurate matrix of neurogenesis-mediated circuit remodeling, we studied afferent and efferent synaptogenesis between developing GCs and two major types of GABAergic interneurons; parvalbumin- (PV-INs) and somatostatin-expressing cells (SST-INs). Inputs from PV-INs targeted the soma and grew abruptly in >4-week-old GCs, coincident with the termination of their highly excitable period. In contrast, inputs from SST-INs were dendritic and developed steadily until reaching maturity by 8 weeks. These step-wise vs. graded patterns of synaptic maturation were also revealed in output synaptogenesis from GCs onto PV-INs and SST-INs. When mature, activity of GCs becomes controlled by feedforward loops dominated by PV-INs, and feedback loops that include both IN types. Therefore, the delayed integration of new cohorts into inhibitory networks generates heterogeneous neuronal populations that contribute to enhance the dynamic range of responsiveness in the dentate gyrus.

## **INTRODUCTION**

Modifications in the connectivity of neural circuits are thought to underlie learning and long-term memory storage, as much as their dysfunction may produce cognitive and psychiatric illness. In most cortical networks, these modifications involve changes in the strength of preexisting synaptic connections, as well as elimination or formation of new synaptic contacts. In the dentate gyrus of the mammalian hippocampus, including humans, plasticity involves the generation of new neurons that develop, integrate in the preexisting granule cell layer, and contribute to information processing [1-5]. Adult-born granule

cells (GCs) play differential roles in processing spatial information and resolve specific behavioral demands, such as the identification of subtle contextual cues required for spatial discrimination [6-9]. In addition, new neurons in the ventral hippocampus are particularly relevant for behavioral responses to fear and stress [10-12]. On the other hand, impaired adult neurogenesis has been associated to cognitive dysfunctions that are commonly found in patients with psychiatric disorders [13]. For instance, genetic mutations in loci that affect the integration of adult-born GCs, such as Disrupted-in-schizophrenia 1 (DISC1), were shown to produce profound behavioral deficits. Thus, understanding the rules that guide proper integration of new GCs in the host networks is essential for harnessing adult neurogenesis as a mechanism of brain plasticity in health and disease.

Adult-born granule cells (GCs) interact dynamically with the preexisting network because of their condition of developing neurons; they change their intrinsic and synaptic characteristics as they grow along the pathway of morphological and functional maturation [2]. With time, their membrane resistance decreases and intrinsic excitability becomes mature, excitatory inputs grow in number, GABA signaling switches from excitation to inhibition [14]. GCs undergo a transient period of high excitability and plasticity due to their reduced inhibition, which is consequence of the weak strength and slow kinetics of GABAergic postsynaptic responses [15]. When new GCs become mature, their functional properties are essentially similar to all other principal cells in the GCL [16]. GABAergic interneurons (INs) provide the inhibition that balances excitation of principal cells in all regions of the mammalian brain, therefore controlling the overall homeostasis of neuronal network [17]. Alterations in this delicate homeostatic balance may be the origin of neurological and psychiatric diseases [18, 19].

GABAergic networks encompass a broad variety of neuronal subtypes, whose specific relevance in the different brain areas remains to be determined. In neocortex and hippocampus, among the multiple

subtypes of GABAergic cells that control the activity level of principal neurons, parvalbumin- (PV) and somatostatin-expressing (SST) INs are the main two types [20, 21]. PV-INs represent ~30% of the GABAergic interneuron population and their axons primarily target perisomatic compartments of postsynaptic neurons [22, 23]. They control the temporal resolution of neuronal integration in hippocampal neurons, regulate plasticity and learning [24-27], and contribute to the synchronization of principal cell activity and the generation of network oscillations [28]. Furthermore, SST-INs represent ~50% of GABAergic INs, and primarily target dendritic compartments in postsynaptic cells. They are involved in dendritic computation and synaptic plasticity [29, 30]. SST-INs control formation of neuronal assemblies during memory acquisition, modulate synaptic plasticity, and contribute to synchronization of neuronal ensembles and the generation of gamma rhythms [24, 31-33].

GABAergic INs contact adult-born GCs before the onset of glutamatergic synaptogenesis, and these initial connections play critical roles in shaping development and integration of new GCs [34-38]. In addition, GC coupling to the GABAergic network shapes their function. While functional maturation is achieved after the sixth week, new GCs begin to participate in network activity at earlier stages and with a differential capacity for neurotransmission and plasticity [2]. Most functional changes associated to GC maturation are a consequence of variations in input and output connections, particularly their coupling to the GABAergic network [39]. Yet, the time course for formation and maturation of synapses between new GCs and the different populations of GABAergic interneurons remains largely unknown. In this study, we show that new GCs establish direct contacts with PV-INs and SST-INs at the pre- and postsynaptic levels. These bidirectional connections develop over a period of several weeks and reach functional maturity at different times; contacts to and from PV-INs develop faster than those of SST-INs. Interestingly, while both IN populations establish feedback inhibitory loops onto the GCL, feedforward loops from the perforant



path onto the GCL primarily mediated by PV-INs. The network mechanisms described here determine different periods of excitation/inhibition balance observed in developing GCs.

## RESULTS

### GABAergic synaptogenesis onto developing GCs

To investigate how inhibition becomes established in new GCs, we characterized the connectivity between developing GCs and two of the main types of dentate gyrus interneurons; PV-INs and SST-INs. PV<sup>Cre</sup> and SST<sup>Cre</sup> mice were utilized to express channelrhodopsin-2 (ChR2) in either interneuron population by crossing them with CAG<sup>floxStopChR2EYFP</sup> mice (Ai32) [40-42]. Retroviral labeling was used to express red fluorescent protein (RV-RFP) in newly generated GCs of the same mice. PV<sup>Cre</sup>; CAG<sup>floxStopChR2EYFP</sup> mice labeled a homogeneous neuronal population that expressed the calcium buffer parvalbumin. Their bodies were localized primarily in the GCL, their axons spread along the GCL, and they displayed high spiking frequency (>100 Hz), typical of GABAergic basket interneurons (**Fig. 1A,B; Fig. S1**). SST<sup>Cre</sup>; CAG<sup>floxStopChR2EYFP</sup> mice labeled neurons that expressed the neuropeptide somatostatin, localized primarily in the hilar region, and displaying variable spiking patterns, corresponding to a heterogeneous population of GABAergic interneurons (**Fig. 1E,F; Fig. S2**).

Stereotaxic surgery was performed in 6–7-week-old mice to deliver a RV-RFP in a cohort of new GCs. ChR2-expressing INs were reliably activated using brief laser pulses (0.2 ms), which elicited spikes with short onset latency (**Fig. S3A-C, Fig. S4A-C**). Whole cell recordings were performed on RFP-GCs in acute slices at 2-8 weeks post injection (wpi). Laser stimulation of PV-INs elicited inhibitory postsynaptic currents (IPSCs) in RFP-GCs that were completely abolished by the GABA<sub>A</sub> receptor antagonist picrotoxin (100 μM), but were not affected by the ionotropic glutamate receptor blocker kynurenic acid (KYN, 6 mM) (**Fig. 1C; Fig. S3D,E**). Together with the fast IPSC onset, these data reveal that PV-INs make monosynaptic

GABAergic contacts onto adult-born CGs (**Fig. S3H**). Activation of Chr2-PVs reliably elicited IPSCs already in 2 wpi GCs, but responses displayed small amplitude and slow kinetics, typical of immature synapses (**Fig. S3F,G**). As GC development progressed, the amplitude of postsynaptic responses increased and kinetics became substantially faster, as revealed by the reduction of half-width and rise time, particularly in the window between 4 and 6 wpi (**Fig. 1D; Fig. S3E-J**). In fact, 4 weeks can be visualized as a transition point with two split populations where some GCs display slow rise time and others have already become fast. Remarkably, while synapse formation from PV-INs to GCs was initiated early in development (before 2 wpi), synaptic maturation was only apparent at >6 wpi, when IPSCs reached fastest kinetics and maximal amplitude. Interestingly, the age-dependent growth in IPSC amplitude was mainly due to an increased quantal size rather than changes in the number of synaptic contacts; no differences were found in the number of functional synapses between young and mature GCs, measured as the ratio between IPSC in saturation and unitary IPSC amplitude (**Fig. S3K-M**). These results demonstrate a slow age-dependent maturation of the PV-IN to GC synapse.

Chr2-SSTs also formed functional monosynaptic contacts onto new GCs as early as 2-3 wpi (**Fig. 1G-J; Fig. S4F-I,L,M**). At these developmental stages, activation of SST-INs reliably elicited IPSCs with small amplitude and slow kinetics (**Fig. S4H-O**). Two types of responses were distinguished based on kinetics, coefficient of variation of the amplitude (**Fig. S4D,E**) and reversal potential; one slow component observed at a depolarized membrane potential, and one fast that was visualized at hyperpolarized potentials. To determine their nature, their amplitude and kinetics were measured by holding the membrane at the reversal potential of the alternate component. Both responses displayed age-dependent increase in IPSC amplitude (**Fig. 1G-J**). However, the kinetic features for both components remained fundamentally unchanged through GC maturation (**Fig. 1H,J; Fig. S4H-O**). Finally, mature synaptic properties were only observed in GCs at >8 wpi. Together, these results show that new GCs receive monosynaptic GABAergic

inputs from PV-INs and SST-INs early in development, and both connections become gradually strengthened along maturation, acquiring mature synaptic properties at 6 to 8 weeks of age.

### **Differential subcellular localization of synapses formed by PV-INs and SST-INs**

In whole-cell recordings, the intracellular  $\text{Cl}^-$  concentration ( $[\text{Cl}^-]_i$ ) near the soma is imposed by the recording patch pipette, whereas  $\text{Cl}^-$  transporters in distal dendritic compartments can overcome the pipette load and maintain physiological levels of  $[\text{Cl}^-]_i$  [43]. This gradient in  $[\text{Cl}^-]_i$  results in differences in the reversal potential of GABA-mediated currents along the somato-dendritic axis [44, 45]. To reveal the subcellular localization of the PV-IN to GC synapse, we monitored the reversal potential of optogenetically activated currents by means of whole-cell recordings under conditions that resulted in an equilibrium potential for  $[\text{Cl}^-]_i$  of -30 mV at perisomatic compartments. Extracellular stimulation of GABAergic axons in the outer molecular layer (OML) was used to activate distal dendritic inputs [45](**Fig. 2A-E**). Thus, activation of PV-INs elicited fast IPSCs with depolarized reversal potential for all neuronal ages, suggesting that synaptic localization was close to the recording compartment (soma) and remained stable throughout GC development. In contrast, OML stimulation evoked slow IPSCs with hyperpolarized reversal potentials as expected for the physiological  $[\text{Cl}^-]_i$  (~-70 mV), suggesting that they originated in the dendritic compartment, located distally from the recording site. In fact, fast-inward and slow-outward IPSCs were simultaneously observed at intermediate membrane potentials ( $V_h$ =-50 mV) when ChR2-PVs and OML stimulation were combined (**Fig. 2B**). These results demonstrate a perisomatic origin for PV-IN-mediated IPSCs at all GC ages.

Stimulation of ChR2-SSTs elicited mixed inward and outward IPSCs in adult-born GCs held at -50 mV (**Fig. 2F-H**), arising from synaptic responses originated in compartments with different distances to the soma. Indeed, the fast current exhibited a depolarized reversal potential (~-30 mV), consistent with a

proximal localization, whereas the slow current reversed at more negative potentials (up to  $\sim -60$  mV), suggesting a distal contact. Proximal IPSCs maintained similar values for reversal potential through GC development, while distal IPSCs showed a subtle but progressive hyperpolarization, consistent with the observation that control of  $[Cl^-]_i$  homeostasis improves during neuronal development [43](**Fig. 2I**). We conclude that Chr2-SSTs establish functional synapses onto new GCs with distinct proximal and distal localizations.

### **Short-term plasticity of GABAergic responses**

During normal behavior, networks of principal neurons and interneurons exhibit complex patterns of activation and undergo spiking discharges in a wide range of frequencies. Under these conditions, synapses are subject to short- and long-lasting activity-dependent modifications of synaptic transmission [46-48]. To investigate how repetitive activity impinges on postsynaptic responses in developing GABAergic synapses, Chr2-PVs or Chr2-SSTs were stimulated by brief trains (5 laser pulses at 20 Hz) and whole-cell recordings were performed in developing GCs. Responses to Chr2-PVs stimulation displayed short-term depression that became more pronounced as GCs matured (**Fig. 3A-D**). These results reveal changes in presynaptic release machinery along synaptic maturation.

SST-IN to GC synapses of proximal and distal locations were discriminated by their reversal potential and their responses upon repetitive stimulation were analyzed separately. Activation of Chr2-SSTs by brief trains (20 Hz) induced a marked short-term depression in proximal IPSCs, which became more pronounced in more mature GCs (**Fig. 3E-H**). In contrast, distal IPSCs showed stable pulse amplitudes along the train and no signs of depression for any of the GC ages (**Fig. 3I-L**). These results further support the conclusion that proximal and distal responses evoked by SST-INs belong to functionally different synapses.

### **GABAergic interneurons control activity in the granule cell layer**

The impact of PV-INs and SST-INs on spiking activity of the granule cell layer (GCL) was monitored in field recordings of excitatory postsynaptic potentials (fEPSPs) evoked by stimulation of the medial perforant path (mPP) (**Fig. 4A**). In these recordings, the area of the population spike (pop-spike) is proportional to the number of active GCs, and the fEPSP slope reflects the strength of the synaptic input. Paired activation of Chr2-PVs with mPP stimulation modulated the fEPSP response; increasing laser power recruited more PV-INs, which resulted in a progressive and reliable reduction of the pop-spike (**Fig. 4B**). SST-INs were also able to control GCL recruitment, but they exerted a smaller effect over the pop-spike than PV-INs. Maximum inhibitory effects were found when PV-INs or SST-INs and mPP axons were simultaneously stimulated (**Fig. 4C-F**). In addition, inhibition of the pop-spike by PV-IN activation was more efficient and acted over a broader time interval compared to SST-INs, in concordance with their larger IPSCs and perisomatic targeting. These data demonstrate that both types of INs can modulate spiking in the GCL, although control by PV-INs is more reliable, probably due to the somatic localization of their synapses.

### **Functional synaptogenesis of GC outputs onto local interneurons**

To map the networks of GABAergic interneurons activated by adult-born GCs, we used retroviruses to selectively express Chr2-GFP in cohorts of new GCs (Chr2-GCs) at different stages of development (3 to 11 wpi). Reliable activation of Chr2-GCs was achieved by laser stimulation (1-ms pulses; **Fig. S5A-C**), allowing the study of synaptic responses in INs.  $PV^{Cre};CAG^{floxStop-tdTomato}$  and  $SST^{Cre};CAG^{floxStop-tdTomato}$  were used to label PV-INs and SST-INs, respectively, and perform whole-cell recordings of excitatory postsynaptic currents (EPSCs; **Fig. 5A-J**). Activation of developing GCs elicited glutamatergic excitatory postsynaptic currents in both PV-INs and SST-INs, but no functional connections were detected before 4–6 wpi (**Fig. S5D-Q**). When responses occurred, they displayed short onset latency (**Fig. S5H,O**) and were blocked by KYN (not shown), indicating that these glutamatergic connections are monosynaptic. At early

ages, GCs elicited a large proportion of transmission failures. As neurons became more mature, the proportion of failures decreased to reach a plateau that occurred at 6 weeks for PV-INs and >8 weeks for SST-INs (**Fig. 5E,J**).

GCs activation in awake behaving rodents can cover a broad range of discharge activity. To better characterize the physiological significance of GC to IN connections, we delivered brief trains of laser stimulation (5 pulses at 20 Hz) onto ChR2-GCs. In contrast to the depression that was typically observed in IPSCs (**Fig. 3**), EPSCs displayed strong facilitation at all developmental stages in both PV-INs and SST-INs (**Fig. 5B-D,G-I**). Facilitation resulted in decreased failures in synaptic transmission along subsequent pulses within a train, suggesting that repetitive firing in GCs is more likely to activate GABAergic INs than individual spikes. In fact, train stimulation revealed connections that remained silent when assessed by individual stimuli (**Fig. 5E,J**). Taking into account the EPSC success rate, which represents the likelihood of finding functional synaptic connections, our data indicate that immature GCs are reliable in establishing connections onto PV-INs, while SST-INs receive sparse inputs.

### **Contribution of PV-INs and SST-INs to inhibitory loops**

Dentate gyrus INs participate in feedforward (FFI) and feedback (FBI) inhibitory microcircuits, with functional impact in both the GCL and CA3. To dissect the participation of PV-INs and SST-INs in those inhibitory loops, we designed an experiment that allowed both an efficient recruitment of IN spiking and the assessment of feedback and feedforward pathways.

We thus combined whole-cell recordings in PV- or SST-INs with simultaneous field recordings in the GCL, and measured responses to electrical stimulation of the mPP to a level that evoked a reliable pop-spike (~50 % of maximum response). When recording from PV-INs, mPP activation typically elicited two

action potentials, one occurring before the peak of the pop-spike and another occurring after a brief delay (**Fig. 6A-C**). This sequence suggests that the first spike was evoked directly by mPP activation, while the second one was evoked by activation of the heterogeneous GC population (including both mature and developing neurons). To test this possibility, we used DCG-IV, an agonist of group II metabotropic glutamate receptors that reduces release probability in mossy fiber terminals and in mPP terminals in the GCL [49, 50]. DCG-IV reduced the amplitude of the fEPSP response, eliminating the pop-spike, which in turn abolished the second PV-IN spike without altering the first one (**Fig. 6D,E**). Subsequent application of KYN blocked the first spike. Together, these results demonstrate that the same individual PV-INs are recruited by mPP axons that activate a feedforward inhibitory loop and by GCs that recruit a feedback loop in the GCL.

In contrast, the same assay showed that SST-INs were primarily recruited to trigger action potentials after the pop-spike (12/12 neurons), with only a small proportion activated before (3/12, **Fig. 6F-H**). Thus, SST-INs mainly participate in feedback inhibition, while their participation in the feedforward inhibitory loop is scarce. Together, these results demonstrate that cortical activity reaching the dentate gyrus through mPP axons recruit feedforward inhibition through PV-INs that exert tight control over GC spiking (Fig. 4). In turn, GCs activate a feedback inhibitory loop by PV-INs, now acting in concert with SST-INs to provide finely tuned activation of the GCL.

## DISCUSSION

The function that neurons acquire in a given circuit depend on their intrinsic properties, relevant for signal integration, and their connections, which determine network dynamics. It has been proposed that developing GCs play unique functional roles in DG computation [6, 9, 51]. We found a slow development

of connectivity between new GCs and GABAergic INs, which conveys immature GCs the property to behave as computational modules with rules that vary along development and are different to those of mature GCs. PV-IN synapses onto new GCs are formed early [34] but, as shown here, synaptic responses mature during several weeks, becoming increasingly stronger and faster. The slow IPSC kinetics corresponding to young synapses render the hyperexcited neuronal behavior described previously [15, 46]. When presynaptic stimuli are trains instead of single pulses, synaptic maturation also influences the reduction of the integration time, transforming slower synapses with sustained effect (at 3–4 weeks), into faster synapses with pronounced depression (8 weeks). When mature, PV-IN to GC synapses display kinetic characteristics and reversal potential typical of basket cells, fast-spiking GABAergic interneurons that innervate the perisomatic region of the target cell [27].

Optical stimulation of SST-INs generated two types of responses that differed in kinetics and reversal potential when measured in mature GCs. We observed a fast response with a hyperpolarized reversal potential that revealed proximal localization, and a slower response with a more depolarized reversal potential that corresponded to dendritic (distal) distribution. SST-ChR2 stimulation using 20 Hz trains resulted in substantial synaptic depression of proximal responses but stable amplitude of distal synaptic currents, which strengthened the idea that proximal and distal responses arise from distinct synapses. It is unclear whether these synapses correspond to axons of the same SST-INs or from different subpopulations of functionally different SST-INs altogether. Electrophysiological characterization of intrinsic properties resulted in groups of SST-INs with different spiking patterns and input resistance (Fig. S2). In this context, we speculate that proximal and distal synapses derive from distinct SST-INs rather than from different axons or terminals of the same IN. It is likely that optical stimulation of SST-INs and PV-INs recruit not only DG interneurons but also long-range projections from CA3 and CA1 regions, which are known to back project to the DG [52]. Altogether, our results are in line with a recent work that reported



heterogeneous populations of SST-INs that could target different cellular compartments depending on the localization of the axons in the DG [30].

Activation of mature GCs recruit FBI that may temporarily reduce the excitability of the GCL [39]. Mossy cells can also exert an inhibitory effect on the GCL by activating a range of interneuron cell types, with a preference for basket cells [53]. As shown here using direct optogenetic activation, both PV-INs and SST-INs control the activation of GCL and could mediate the FBI triggered by GCs, although PV-INs exert more efficient inhibition probably due to the localization and strength of their output contacts. Here we performed two experiments to monitor the effects of FBI in the network. First, optogenetic activation of adult-born GCs elicited EPSCs in PV-INs and SST-INs, which demonstrates that both INs are direct targets of new GCs. Second, activation of mPP axons recruited spiking in the GCL and both INs fired after the pop-spike, which indicates that GCs elicit spiking of PV-INs and SST-INs in the DG. Together, these results show that the FBI loop that controls activity of the GCL involves both PV-INs and SST-INs. Instead, FFI is mainly exerted by PV-INs only, which is probably a consequence of the hilar localization of SST-IN dendrites that are not reached by entorhinal cortical axons. This result is also consistent with the recent observation that the mPP recruits basket PV-INs with greater efficacy than SST-INs [48]. Altogether, dendritic inhibition by SST-INs would control the flow of information from the entorhinal cortex to the hippocampus via the DG, whereas perisomatic inhibition mediated by PV- and SST-INs would support the temporal coordination of rhythmic DG activity.

Immature GCs are weakly coupled to local inhibitory INs and hyperactivity is transmitted forward in the hippocampal network towards CA3 [15, 39, 46]. According to our data, immature GC outputs might underlie this delayed coupling to FBI, which has been proposed to be crucial for input discrimination. In addition, immature GCs respond to a wider range of spiking frequencies, while mature GC are less

responsive at high frequencies. This difference is dictated by feedforward inhibition, which restricts mature GC activation by perforant-path axons. The temporal summation of inhibitory currents elicited by PV-INs during repetitive activation of the GCs might support this high-frequency filter. Moreover, GABAergic INs are only recruited by adult-born GCs in late development, and the rate of responsiveness increases for spike trains. This notion is consistent with recent findings that CA3 pyramidal cells are largely inhibited when GCs are activated with trains, but inhibition is weaker when single action potentials occur [54].

SST-INs conform a heterogeneous group with a broad range of intrinsic firing properties (Fig. S2) and axonal distribution [30]. These subgroups of SST-INs may be responsible for contacting different subcellular regions in postsynaptic targets. We used an SST-Cre line to express ChR2, which resulted in a broad range of IN activation in optogenetic experiments, including those that are less represented. Two subtypes of SST-INs were recently reported in the DG; hilar-perforant-path-associated INs with axon fibers in the molecular layer, and hilar INs with axons in the hilus [30]. Hilar INs make perisomatic contacts onto other INs, and might be candidates to establish contacts close to GC somata. Proximal SST-mediated IPSCs are weaker and display slower kinetics than PV-IN IPSCs (rise time: about 1 ms for PV-INs and 2 ms for SST-INs proximal). These results suggest that proximal contacts from PV-INs and SST-INs may differ in distance, number of contacts and postsynaptic receptor subunits. Furthermore, both PV-INs and SST-INs have the capacity to strongly attenuate the activation in GCL, but the closer proximity of PV-INs contacts make them more efficient to modulate GCs activity.

How do these data contribute to better understanding of the role of adult neurogenesis in information processing? It has been proposed that newly generated GCs recruit feedback inhibition onto the GCL in a manner that contributes to refine sparse coding [55]. Adult-born DGs were shown to reduce activity in

the GCL under different conditions, particularly at developmental stages that were fairly mature. In addition, increased neurogenesis was correlated with a reduction in DG excitability, while blocking production of new GCs or their silencing produced the opposite effect [12, 56, 57]. The findings presented here and our previous findings are in agreement with the notion that mature adult-born GCs recruit substantial FBI onto the DG network. However, FBI is also triggered powerfully by mature GCs born in the developing DG [39], and therefore inhibition of the GCL is not an event uniquely associated to adult-born neurons. In this context, our results highlight a distinctive role for adult-born GCs that have not yet reached total network integration. We show that connections that conform the FBI network develop at a slow pace, and continue to mature over extended periods. During these extended maturation time, new GCs continue to be poorly coupled to inhibitory inputs, which results in diminished inhibition, and outputs, resulting in weaker recruitment of FBI in the DG. Until coupling to both PV-IN and SST-IN networks becomes fully mature, adult-born GCs continue to *escape* inhibition and are likely to act as direct information transfers to circuits downstream from the dentate gyrus.

## **ACKNOWLEDGMENTS**

We thank the members of the A.F.S. lab and Guillermo Lanuza lab for insightful discussions. A.F.S. is investigator in the Consejo Nacional de Investigaciones Científicas y Técnicas (CONICET). S.M.Y. and A.I.G. were supported by CONICET fellowships. This work was supported by grants from the Argentine Agency for the Promotion of Science and Technology (PICT2015-3814 and PICT2016-0675), Howard Hughes Medical Institute (#55007652), and NIH (R01NS103758) to A.F.S.

## **MATERIALS AND METHODS**

### **Animals and surgery for retroviral delivery**

Genetically modified mice *Pvalb<sup>tm1(cre)Arbr</sup>* mice [40], kindly provided by S. Arber, *Sst<sup>tm2.1(cre)Zjh/J</sup>* mice [42], and *CAG<sup>floxStop-tdTomato</sup> (Ai14) (B6;129S6-Gt(ROSA)26Sor<sup>tm14(CAG-tdTomato)Hze</sup>/J)* conditional reporter line [58], obtained from Hongkui Zeng, were crossed to generate *PV<sup>Cre</sup>; CAG<sup>FloxStopTom</sup>* mice and *SST<sup>Cre</sup>; CAG<sup>FloxStopTom</sup>* mice to label PV- and SST-expressing GABAergic interneurons (Tom-PV and Tom-SST), respectively. *Pvalb<sup>tm1(cre)Arbr</sup>* and *Sst<sup>tm2.1(cre)Zjh/J</sup>* mice were also crossed with *CAG<sup>floxStopChr2-EYFP</sup> (Ai32) (Gt(ROSA)26Sor<sup>tm32(CAGCOP4\*H134R/EYFP)Hze</sup>/J)* mice from Jackson Laboratories, to generate *PV<sup>Cre</sup>; CAG<sup>FloxStopChr2</sup>* and *SST<sup>Cre</sup>; CAG<sup>FloxStopChr2</sup>* mice. Mice were maintained in C57Bl/6J background.

Genetically modified mice of either sex were used at 6 – 7 weeks of age, housed at 2 – 4 mice per cage. Running wheel housing started 2-3 days before surgery and continued until the day of slice preparation, to maximize the number of retrovirally transduced neurons. For surgery, mice were anesthetized (150 µg ketamine/15 µg xylazine in 10 µl saline/g), and virus (1 – 1.2 µl at 0.15 µl/min) was infused into the dorsal area of the right dentate gyrus using sterile microcapillary calibrated pipettes and stereotaxic references (coordinates from bregma: -2 mm anteroposterior, -1.5 mm lateral, -1.9 mm ventral). Experimental protocols were approved by the Institutional Animal Care and Use Committee of the Leloir Institute according to the Principles for Biomedical Research involving animals of the Council for International Organizations for Medical Sciences and provisions stated in the Guide for the Care and Use of Laboratory Animals.

### **Retroviral vectors**

A replication-deficient retroviral vector based on the Moloney murine leukemia virus was used to specifically transduce adult-born granule cells as done previously [15, 59]. Retroviral particles were assembled using three separate plasmids containing the capsid (CMV-vsrg), viral proteins (CMV-gag/pol) and the transgenes: CAG-RFP or channelrhodopsin-2 (ChR2; Ubi-ChR2-EGFP retroviral plasmid, kindly provided by S. Ge, SUNY Stony Brook). Plasmids were transfected onto HEK 293T cells using deacylated polyethylenimine. Virus-containing supernatant was harvested 48 h after transfection and concentrated by two rounds of ultracentrifugation. Virus titer was typically  $\sim 10^5$  particles/ $\mu$ l.

CAG-RFP retrovirus were infused into PV<sup>Cre</sup>; CAG<sup>floxStopChR2-EYFP</sup> or SST<sup>Cre</sup>; CAG<sup>floxStopChR2-EYFP</sup> mice to obtain GCs expressing RFP (RFP-GC), and PV- or SST-INs expressing ChR2 (ChR2-PV or ChR2-SST). Inversely, Ubi-ChR2-EGFP retrovirus were delivered into PV<sup>Cre</sup>; CAG<sup>floxStoptd-Tomato</sup> or SST<sup>Cre</sup>; CAG<sup>floxStoptd-Tomato</sup> to obtain GCs expressing ChR2 (ChR2-GC), and PV- or SST-INs expressing td-Tomato (Tom-PV or Tom-SST).

### **Electrophysiological recordings**

Slice preparation. Mice were anesthetized and decapitated at different weeks post injection (wpi) as indicated, and transverse slices were prepared as described previously [15]. Briefly, brains were removed into a chilled solution containing (in mM): 110 choline-Cl, 2.5 KCl, 2.0 NaH<sub>2</sub>PO<sub>4</sub>, 25 NaHCO<sub>3</sub>, 0.5 CaCl<sub>2</sub>, 7 MgCl<sub>2</sub>, 20 glucose, 1.3 Na<sup>+</sup>-ascorbate, 0.6 Na<sup>+</sup>-pyruvate and 4 kynurenic acid. The hippocampus was dissected and transverse slices of septal pole (400  $\mu$ m thick) were cut in a vibratome (Leica VT1200 S, Nussloch, Germany) and transferred to a chamber containing artificial cerebrospinal fluid (ACSF; in mM): 125 NaCl, 2.5 KCl, 2 NaH<sub>2</sub>PO<sub>4</sub>, 25 NaHCO<sub>3</sub>, 2 CaCl<sub>2</sub>, 1.3 MgCl<sub>2</sub>, 1.3 Na<sup>+</sup>-ascorbate, 3.1 Na<sup>+</sup>-pyruvate, and 10 glucose (315 mOsm). Slices were bubbled with 95% O<sub>2</sub>/5% CO<sub>2</sub> and maintained at 30°C for at least 1 hour before experiments started.

Electrophysiology. Whole-cell and cell-attached recordings were performed at room temperature (23  $\pm$  2 °C) using microelectrodes (4-6 M $\Omega$  for GCs and 3-5 M $\Omega$  for INs) filled with internal solution. All internal

solution contained in common (in mM): 0.1 EGTA, 10 HEPES, 4 ATP-tris and 10 phosphocreatine, with pH 7.3 and 290 mOsm. To record INs or Chr2-GCs, we used internal solution with the following additional composition (in mM): 150 K-gluconate, 1 NaCl and 4 MgCl<sub>2</sub>. To measure IPSCs in RFP-GCs, we filled the recording electrodes with (in mM): 110 K-gluconate, 5 NaCl, 30 KCl and 4 MgCl<sub>2</sub>. Field recordings were performed using patch pipettes (2-4 M $\Omega$ ) filled with 3 M NaCl. All recordings were obtained using Axopatch 200B amplifiers (Molecular Devices, Sunnyvale, CA), digitized (Digidata 1322A, Molecular Devices), and acquired at 10-20 KHz onto a personal computer using the pClamp 9 software (Molecular Devices).

Whole-cell voltage-clamp recordings were performed at a holding potential (V<sub>h</sub>) of -70 mV, except for the experiment to study the reversal potential of GABAergic current onto GCs (Fig. 2). For GCs, series resistance was typically 10–20 M $\Omega$ , and experiments were discarded if higher than 25 M $\Omega$ . For INs, series resistance was typically 5–10 M $\Omega$ , and experiments were discarded if higher than 15 M $\Omega$ .

Recording target. Adult-born GCs expressing RFP or Chr2 were binned in the following age groups: 13-14 dpi (2 wpi), 20-22 dpi (3 wpi), 27-30 dpi (4 wpi), 40-44 dpi (6 wpi), 54-60 dpi (8 wpi) and 75-77 dpi (11 wpi). In previous work we have compared mature neurons born in 15-day-old embryos (which populate the outer granule cell layer), 7-day-old pups and adult mice, finding no functional differences among neuronal groups [16]. Therefore, unlabeled neurons localized in the outer third of the granule cell layer were selected here as mature controls. Recorded neurons were visually identified in the granule cell layer by fluorescence (FITC fluorescence optics; DMLFS, Leica) and/or infrared DIC videomicroscopy. Criteria to include cells in the analysis were visual confirmation of fluorescent protein (RFP, Tom, GFP or YFP) in the pipette tip, attachment of the labeled soma to the pipette when suction is performed, and absolute leak current <100 pA and <250 pA at V<sub>h</sub> for GCs and INs, respectively. Since INs are differentially distributed over distinct DG areas, we tried to maintain this proportion on the number of recorded INs in each region (Fig. 5; Fig. S1, Fig. S2).

Optogenetics. Patch-clamp recordings were carried out in GCs or in DG INs from hippocampal slices containing several INs or GCs expressing ChR2 (ChR2-PVs, ChR2-SSTs or ChR2-GCs). The latter were visualized by their EGFP or EYFP expression, as previously described [60]. ChR2-neurons were stimulated using a 447 nm laser source delivered through the epifluorescence pathway of the upright microscope (FITC filter, 63X objective for whole-cell recordings, and 20X for field recordings) commanded by the acquisition software. Laser pulses (1 ms onto ChR2-GCs and 0.2 ms onto ChR2-INs) were delivered at 0.07 Hz while postsynaptic currents were recorded in voltage-clamp configuration. The laser power intensity was <150 mW. EPSCs onto INs were isolated by voltage clamping the neurons at the reversal potential of the IPSC ( $V_h = -70$  mV). When analyze the spikes evoked onto INs through GC-ChR2 stimulation or activation of afferent pathway, the former were hold at -60 mV. To study unitary IPSCs, laser intensity was lowered to reach a condition where the GCs displayed both failures (in at least 10% of the total trials) and small IPSCs. Glutamatergic currents were blocked by KYN 4 mM and GABAergic currents were blocked by PTX 100  $\mu$ m.

Field recordings. Medial perforant path (mPP) stimulation was performed by placing a steel monopolar electrode in the middle of the molecular layer, and current pulses ranging from 10 to 150  $\mu$ A (0.2 ms) were applied at 0.07 Hz. The recording microelectrode was placed in the GCL to record the population spike (pop-spike) in response to mPP stimulation [15]. Experiments were performed at stimulus intensities that evoked 30 - 55 % of maximal pop-spike amplitude. Population activity was recorded by several subsequent trials until stable pop-spike amplitude was obtained. At that moment, a laser pulse (0.2 ms) was paired to mPP stimulation at different times (as indicated), alternating 5 consecutives trials with the laser on and 5 trials off.

Reversal potential of GABAergic currents onto GCs. Outer molecular layer (OML) stimulation was performed by placing a steel monopolar electrode in the outer third of the molecular layer, at least 300

$\mu\text{m}$  away from the recording site. Current pulses ranging from 40 to 100  $\mu\text{A}$  (0.2 ms) were applied at 0.05 Hz to recruit GABAergic current of dendritic origin. In addition, IPSCs evoked onto GCs in response to optogenetics stimulation of ChR2-INs were measured. This study was performed in presence of kynurenic acid.

### **Immunofluorescence**

Immunostaining was performed in 60  $\mu\text{m}$  free-floating coronal sections throughout the brain from six weeks old PV<sup>Cre</sup> and SST<sup>Cre</sup>; CAG<sup>FloxStopChR2</sup> mice. Antibodies were applied in TBS with 3% donkey serum and 0.25% Triton X-100. Triple labeled immunofluorescence was performed using the following primary antibodies: GFP (Green Fluorescent Protein, Chicken antibody IgY Fraction 1:500, Aves Labs Inc.), PV (mouse anti-Parvalbumin monoclonal antibody, 1:3000, Swant) and SOM (rat-anti Somatostatin monoclonal antibody 1:250, Millipore). The following corresponding secondary antibodies were used: donkey anti-chicken Cy2, donkey anti-mouse Cy5 and donkey anti-rat Cy3, (1:250; Jackson ImmunoResearch Laboratories). Incubation with Dapi (10 minutes) was applied to avoid fluorescence bleaching when slice characterization was performed.

### **Confocal microscopy**

Sections from the hippocampus (antero-posterior, -0.94 to -3.4 mm from bregma) according to the mouse brain atlas (Paxinos and Franklin, 2004) were included. Images were acquired using Zeiss LSM 510 Meta microscope (Carl Zeiss, Jena, Germany). Analysis of antibody expression was restricted to cells with fluorescence intensity levels that enabled clear identification of their somata. Images were acquired (40X, NA 1.3, oil-immersion) and colocalization for the three markers was assessed in z-stacks using multiple planes for each cell. Colocalization was defined as positive if all markers were found in the same focal plane.



## Data analysis

Analysis of all recordings was performed off-line using in-house made Matlab routines.

Intrinsic Properties. Membrane capacitance and input resistance were obtained from current traces evoked by a hyperpolarizing step (10 mV, 100 ms). Spiking profile was recorded in current-clamp configuration (membrane potential was kept at -70 mV by passing a holding current) and the threshold current for spiking was assessed by successive depolarizing current steps (10 pA for GCs and 50 pA for INs; 500 ms) to drive the membrane potential ( $V_m$ ) from resting to 0 mV.

Action potential threshold was defined as the point at which the derivative of the membrane potential  $dV_m/dt$  was 5 mV/ms (data not shown). AP amplitude was measured from threshold to positive peak and after-hyperpolarization amplitude, from threshold to negative peak during repolarization. Time between consecutive spikes (interspike interval, ISI) was measured from peak to peak. Instantaneous frequency was calculated from ISI and adaptation ratio was defined as the ISI ratio between the third spike and the last spike. To perform the whole spiking characterization, we measured the threshold current intensity and a stimulus intensity three times higher than the threshold was used to evaluate all the parameters.

Postsynaptic Currents. Statistical methods were used to differentiate laser-responsive cells and laser-evoked events from spontaneous activity using in-house Matlab routines. Events were identified as peaks in the low-pass filtered current (<250 Hz) when exceeded 4 standard deviations of the noise level (measured at >500 Hz high-pass filtered current). The onset of an event was defined as the time in which 10 % of the maximum amplitude was reached in the unfiltered signal. Once all events were identified, a cell was classified as responsive to laser stimulation if there was a tendency greater than chance for events to accumulate within a time window of 12 ms after laser stimulation ( $p < 0.05$ ). In order to achieve such a classification, the probability distribution of a similar accumulation of spontaneous events happening by

pure chance was determined for each cell using a 2000 step shuffling procedure. Once a cell was classified as responsive to laser, spontaneous and laser-evoked events were differentiated.

In all cases, reported PSCs values for peak amplitude correspond to the product of the mean value for positive trials and the probability of success, taken as the fraction of trials in which an evoked response was observed. The rise time was calculated from 20% to 80% (EPSC) or 70% (IPSC) of peak amplitude, and decay time was calculated from 80% (EPSC) or 70% (IPSC) to 30%.

Response to repetitive stimulation. The charge of laser evoked events during repetitive stimulation was measured within a time window equal to the distance between two consecutive laser pulses, starting at the corresponding pulse. To analyze short-term plasticity, we calculated the charge ratio during repetitive stimulation. To perform this normalization, we used the response evoked by the first pulse for INs onto GCs synapses and the charge related to the last pulse for GCs onto INs synapses.

### **Statistical analysis**

Unless otherwise specified, data are presented as mean  $\pm$  SEM. Normality was assessed using Shapiro-Wilk's test, D'Agostino & Pearson omnibus test, and Kolmogórov-Smirnov's test, at a significance level of 0.05. A distribution was considered as normal if all tests were passed. When a data set did not satisfy normality criteria, non-parametric statistics were applied. Two-tailed Mann-Whitney's test was used for single comparisons, two-tailed Wilcoxon matched pairs signed rank test was applied for paired values, Kruskal-Wallis test by ranks was employed to compare multiple unmatched groups and Friedman test followed by Dunn's post test was used to compare multiple matched groups. For normal distributions, homoscedasticity was assessed using Bartlett's test and F-test, at a significance level of 0.05. For homogeneous variances, two-tailed t-test was used for single comparisons, and ANOVA test followed by post-hoc Bonferroni's test was used for multiple comparisons. Two sample Kolmogorov-Smirnov test was

applied to compare cumulative distributions. Two-tailed Fisher's exact test (small sample size) or Chi-square test were used in the analysis of contingency tables.

## REFERENCES

1. van Praag H, Schinder AF, Christie BR, Toni N, Palmer TD, Gage FH. Functional neurogenesis in the adult hippocampus. *Nature*. 2002;415(6875):1030-4.
2. Mongiat LA, Schinder AF. Adult neurogenesis and the plasticity of the dentate gyrus network. *Eur J Neurosci*. 2011;33(6):1055-61. PMID: 21395848
3. Goncalves JT, Schafer ST, Gage FH. Adult Neurogenesis in the Hippocampus: From Stem Cells to Behavior. *Cell*. 2016;167(4):897-914. PMID: 27814520
4. Zhang H, Kang E, Wang Y, Yang C, Yu H, Wang Q, et al. Brain-specific Crmp2 deletion leads to neuronal development deficits and behavioural impairments in mice. *Nat Commun*. 2016;7. PMID: 27249678
5. Moreno-Jiménez EP, Flor-García M, Terreros-Roncal J, Rábano A, Cafini F, Pallas-Bazarra N, et al. Adult hippocampal neurogenesis is abundant in neurologically healthy subjects and drops sharply in patients with Alzheimer's disease. *Nature medicine*. 2019;in press.
6. Clelland CD, Choi M, Romberg C, Clemenson GD, Jr., Fragniere A, Tyers P, et al. A functional role for adult hippocampal neurogenesis in spatial pattern separation. *Science*. 2009;325(5937):210-3.
7. Nakashiba T, Cushman JD, Pelkey KA, Renaudineau S, Buhl DL, McHugh TJ, et al. Young Dentate Granule Cells Mediate Pattern Separation, whereas Old Granule Cells Facilitate Pattern Completion. *Cell*. 2012;149(1):188-201. PMID: 22365813
8. Sahay A, Wilson DA, Hen R. Pattern separation: a common function for new neurons in hippocampus and olfactory bulb. *Neuron*. 2011;70(4):582-8. PMID: 21609817
9. Kropff E, Yang SM, Schinder AF. Dynamic role of adult-born dentate granule cells in memory processing. *Curr Opin Neurobiol*. 2015;35:21-6. PMID: 26100379

10. Guo N, Soden ME, Herber C, Kim MT, Besnard A, Lin P, et al. Dentate granule cell recruitment of feedforward inhibition governs engram maintenance and remote memory generalization. *Nature medicine*. 2018;24(4):438-49. PMID: 29529016
11. Anacker C, Hen R. Adult hippocampal neurogenesis and cognitive flexibility - linking memory and mood. *Nat Rev Neurosci*. 2017;18(6):335-46. PMID: 28469276
12. Anacker C, Luna VM, Stevens GS, Millette A, Shores R, Jimenez JC, et al. Hippocampal neurogenesis confers stress resilience by inhibiting the ventral dentate gyrus. *Nature*. 2018;559(7712):98-102. PMID: 29950730
13. Kang E, Wen Z, Song H, Christian KM, Ming GL. Adult Neurogenesis and Psychiatric Disorders. *Cold Spring Harb Perspect Biol*. 2016. PMID: 26801682
14. Ge S, Pradhan DA, Ming GL, Song H. GABA sets the tempo for activity-dependent adult neurogenesis. *Trends Neurosci*. 2006.
15. Marin-Burgin A, Mongiat LA, Pardi MB, Schinder AF. Unique processing during a period of high excitation/inhibition balance in adult-born neurons. *Science*. 2012;335(6073):1238-42. PMID: 22282476
16. Laplagne DA, Espósito MS, Piatti VC, Morgenstern NA, Zhao C, van Praag H, et al. Functional convergence of neurons generated in the developing and adult hippocampus. *PLoS Biol*. 2006;4(12):e409.
17. Isaacson JS, Scanziani M. How inhibition shapes cortical activity. *Neuron*. 2011;72(2):231-43. PMID: 22017986
18. Lewis DA, Hashimoto T, Volk DW. Cortical inhibitory neurons and schizophrenia. *Nat Rev Neurosci*. 2005;6(4):312-24. PMID: 15803162
19. Marin O. Interneuron dysfunction in psychiatric disorders. *Nat Rev Neurosci*. 2012;13(2):107-20. PMID: 22251963
20. Hosp JA, Struber M, Yanagawa Y, Obata K, Vida I, Jonas P, et al. Morpho-physiological criteria divide dentate gyrus interneurons into classes. *Hippocampus*. 2014;24(2):189-203. PMID: 24108530

21. Kepecs A, Fishell G. Interneuron cell types are fit to function. *Nature*. 2014;505(7483):318-26. PMID: 24429630
22. Freund TF, Buzsaki G. Interneurons of the hippocampus. *Hippocampus*. 1996;6(4):347-470.
23. Freund TF. Interneuron Diversity series: Rhythm and mood in perisomatic inhibition. *Trends Neurosci*. 2003;26(9):489-95.
24. Wilson NR, Runyan CA, Wang FL, Sur M. Division and subtraction by distinct cortical inhibitory networks in vivo. *Nature*. 2012;488(7411):343-8. PMID: 22878717
25. Atallah BV, Bruns W, Carandini M, Scanziani M. Parvalbumin-expressing interneurons linearly transform cortical responses to visual stimuli. *Neuron*. 2012;73(1):159-70. PMID: 22243754
26. Lee SH, Kwan AC, Zhang S, Phoumthipphavong V, Flannery JG, Masmanidis SC, et al. Activation of specific interneurons improves V1 feature selectivity and visual perception. *Nature*. 2012;488(7411):379-83. PMID: 22878719
27. Hu H, Gan J, Jonas P. Interneurons. Fast-spiking, parvalbumin(+) GABAergic interneurons: from cellular design to microcircuit function. *Science*. 2014;345(6196):1255-263. PMID: 25082707
28. Bartos M, Vida I, Jonas P. Synaptic mechanisms of synchronized gamma oscillations in inhibitory interneuron networks. *Nat Rev Neurosci*. 2007;8(1):45-56. PMID: 17180162
29. Savanthrapadian S, Meyer T, Elgueta C, Booker SA, Vida I, Bartos M. Synaptic properties of SOM- and CCK-expressing cells in dentate gyrus interneuron networks. *J Neurosci*. 2014;34(24):8197-209. PMID: 24920624
30. Yuan M, Meyer T, Benkowitz C, Savanthrapadian S, Ansel-Bollepalli L, Foggetti A, et al. Somatostatin-positive interneurons in the dentate gyrus of mice provide local- and long-range septal synaptic inhibition. *eLife*. 2017;6. PMID: 28368242
31. Adesnik H, Bruns W, Taniguchi H, Huang ZJ, Scanziani M. A neural circuit for spatial summation in visual cortex. *Nature*. 2012;490(7419):226-31. PMID: 23060193

32. Seybold BA, Phillips EAK, Schreiner CE, Hasenstaub AR. Inhibitory Actions Unified by Network Integration. *Neuron*. 2015;87(6):1181-92. PMID: 26402602
33. Sturgill JF, Isaacson JS. Somatostatin cells regulate sensory response fidelity via subtractive inhibition in olfactory cortex. *Nat Neurosci*. 2015;18(4):531-5. PMID: 25751531
34. Song J, Sun J, Moss J, Wen Z, Sun GJ, Hsu D, et al. Parvalbumin interneurons mediate neuronal circuitry-neurogenesis coupling in the adult hippocampus. *Nat Neurosci*. 2013;16(12):1728-30. PMID: 24212671
35. Overstreet Wadiche LS, Bromberg DA, Bensen AL, Westbrook GL. GABAergic signaling to newborn neurons in dentate gyrus. *JNeurophysiol*. 2005;94 (6):4528-32.
36. Espósito MS, Piatti VC, Laplagne DA, Morgenstern NA, Ferrari CC, Pitossi FJ, et al. Neuronal differentiation in the adult hippocampus recapitulates embryonic development. *JNeurosci*. 2005;25(44):10074-86.
37. Alvarez DD, Giacomini D, Yang SM, Trinchero MF, Temprana SG, Buttner KA, et al. A disinaptic feedback network activated by experience promotes the integration of new granule cells. *Science*. 2016;354(6311):459-65. PMID: 27789840
38. Ge S, Goh EL, Sailor KA, Kitabatake Y, Ming GL, Song H. GABA regulates synaptic integration of newly generated neurons in the adult brain. *Nature*. 2006;439(7076):589-93.
39. Temprana SG, Mongiat LA, Yang SM, Trinchero MF, Alvarez DD, Kropff E, et al. Delayed coupling to feedback inhibition during a critical period for the integration of adult-born granule cells. *Neuron*. 2015;85(1):116-30. PMID: 25533485
40. Hippenmeyer S, Vrieseling E, Sigrist M, Portmann T, Laengle C, Ladle DR, et al. A developmental switch in the response of DRG neurons to ETS transcription factor signaling. *PLoS Biol*. 2005;3(5):e159. PMID: 15836427

41. Madisen L, Mao T, Koch H, Zhuo JM, Berenyi A, Fujisawa S, et al. A toolbox of Cre-dependent optogenetic transgenic mice for light-induced activation and silencing. *Nat Neurosci.* 2012;15(5):793-802. PMID: 22446880
42. Taniguchi H, He M, Wu P, Kim S, Paik R, Sugino K, et al. A resource of Cre driver lines for genetic targeting of GABAergic neurons in cerebral cortex. *Neuron.* 2011;71(6):995-1013. PMID: 21943598
43. Khirug S, Huttu K, Ludwig A, Smirnov S, Voipio J, Rivera C, et al. Distinct properties of functional KCC2 expression in immature mouse hippocampal neurons in culture and in acute slices. *EurJNeurosci.* 2005;21(4):899-904.
44. Pearce RA. Physiological evidence for two distinct GABAA responses in rat hippocampus. *Neuron.* 1993;10(2):189-200.
45. Laplagne DA, Kamienkowski JE, Espósito MS, Piatti VC, Zhao C, Gage FH, et al. Similar GABAergic inputs in dentate granule cells born during embryonic and adult neurogenesis. *EurJNeurosci.* 2007;25(10):2973-81.
46. Pardi MB, Ogando MB, Schinder AF, Marin-Burgin A. Differential inhibition onto developing and mature granule cells generates high-frequency filters with variable gain. *eLife.* 2015;4:e08764. PMID: 26163657
47. Lee CT, Kao MH, Hou WH, Wei YT, Chen CL, Lien CC. Causal Evidence for the Role of Specific GABAergic Interneuron Types in Entorhinal Recruitment of Dentate Granule Cells. *Sci Rep.* 2016;6:36885. PMID: 27830729
48. Hsu TT, Lee CT, Tai MH, Lien CC. Differential Recruitment of Dentate Gyrus Interneuron Types by Commissural Versus Perforant Pathways. *Cereb Cortex.* 2016;26(6):2715-27. PMID: 26045570
49. Macek TA, Winder DG, Gereau RWt, Ladd CO, Conn PJ. Differential involvement of group II and group III mGluRs as autoreceptors at lateral and medial perforant path synapses. *J Neurophysiol.* 1996;76(6):3798-806. PMID: 8985877



50. Kamiya H, Shinozaki H, Yamamoto C. Activation of metabotropic glutamate receptor type 2/3 suppresses transmission at rat hippocampal mossy fibre synapses. *JPhysiol.* 1996;493 ( Pt 2):447-55.
51. Kim WR, Christian K, Ming GL, Song H. Time-dependent involvement of adult-born dentate granule cells in behavior. *Behav Brain Res.* 2011. PMID: 21801754
52. Szabo GG, Du X, Oijala M, Varga C, Parent JM, Soltesz I. Extended Interneuronal Network of the Dentate Gyrus. *Cell reports.* 2017;20(6):1262-8. PMID: 28793251
53. Scharfman HE. Advances in understanding hilar mossy cells of the dentate gyrus. *Cell and tissue research.* 2018;373(3):643-52. PMID: 29222692
54. Lee J, Yun M, Cho E, Lee JW, Lee D, Jung MW. Transient effect of mossy fiber stimulation on spatial firing of CA3 neurons. *Hippocampus.* 2019. PMID: 30609178
55. McAvoy K, Besnard A, Sahay A. Adult hippocampal neurogenesis and pattern separation in DG: a role for feedback inhibition in modulating sparseness to govern population-based coding. *Frontiers in systems neuroscience.* 2015;9:120. PMID: 26347621
56. Ikrar T, Guo N, He K, Besnard A, Levinson S, Hill A, et al. Adult neurogenesis modifies excitability of the dentate gyrus. *Front Neural Circuits.* 2013;7:204. PMID: 24421758
57. Drew LJ, Kheirbek MA, Luna VM, Denny CA, Clويدt MA, Wu MV, et al. Activation of local inhibitory circuits in the dentate gyrus by adult-born neurons. *Hippocampus.* 2016;26(6):763-78. PMID: 26662922
58. Madisen L, Zwingman TA, Sunkin SM, Oh SW, Zariwala HA, Gu H, et al. A robust and high-throughput Cre reporting and characterization system for the whole mouse brain. *Nature neuroscience.* 2010;13(1):133-40. PMID: 20023653
59. Piatti VC, Davies-Sala MG, Esposito MS, Mongiat LA, Trincherо MF, Schinder AF. The timing for neuronal maturation in the adult hippocampus is modulated by local network activity. *J Neurosci.* 2011;31(21):7715-28. PMID: 21613484

60. Toni N, Laplagne DA, Zhao C, Lombardi G, Ribak CE, Gage FH, et al. Neurons born in the adult dentate gyrus form functional synapses with target cells. *NatNeurosci.* 2008;11(8):901-7.

## FIGURE LEGENDS

**Figure 1. GABAergic synaptogenesis onto developing GCs.** (A) Confocal image of a 60  $\mu\text{m}$ -thick hippocampal section depicting PV-INs in a  $\text{PV}^{\text{Cre}}; \text{CAG}^{\text{floXStopChR2-EGFP}}$  mouse. (GCL: granule cell layer; ML: molecular layer). Scale bar, 50  $\mu\text{m}$ . Insets show single optical planes of PV-INs (soma indicated by the arrow) displaying immunolabeling for PV (red), expression of ChR2-EYFP (blue), and their overlay (bottom). Scale bar, 20  $\mu\text{m}$ . (B) Distribution of cell body localization in different areas of the DG. (C) *Left panel*, experimental scheme of laser-mediated stimulation of PV-INs combined with IPSCs recordings in adult-born GCs, and example traces from a 4-wpi GC showing blockade by PTX (100  $\mu\text{M}$ , red) but not by KYN (6 mM, green). Scale bars, 50 pA, 20 ms. *Right panel*, IPSCs elicited by laser pulses (0.2 ms, blue marks) delivered at low frequency (0.07 Hz), recorded from GCs at 3 and 8 wpi. Traces depict individual sweeps (gray) and their average (black). Scale bars, 200 pA, 20 ms. (D) IPSC peak amplitude and rise time for different GC ages. Dots correspond to individual neurons. Blue circles correspond to example traces shown in (C). (E) Confocal image depicting SST-INs in a  $\text{SST}^{\text{Cre}}; \text{CAG}^{\text{floXStopChR2-EGFP}}$  mouse. Scale bar, 50  $\mu\text{m}$ . Insets show single optical planes of SST-INs (soma indicated by the arrow) displaying immunolabeling for SST (red), ChR2-EYFP (blue), and their overlay. Scale bar, 10  $\mu\text{m}$ . (F) Cell body localization in different areas of the DG. (G-J) Laser stimulation of SST-INs evoked IPSCs with different kinetics and reversal potentials. Recordings performed at  $V_h = -70$  mV (G,H) elicited fast IPSCs, whereas traces obtained at  $V_h = -30$  mV (I,J) were slower. Scale bars 20 pA, 10 ms. Sample sizes, >11 neurons from >4 mice (PV-INs), and >9 neurons in >2 mice (SST-INs). Statistical comparisons were done using one-way ANOVA followed by *post hoc* Bonferroni's test for multiple comparisons against mature condition, with  $p < 0.05$  (\*),  $p < 0.01$  (\*\*), and  $p < 0.001$  (\*\*\*)).

**Figure 2. Differential localization of synapses formed by PV-INs and SST-INs.** (A) Experimental scheme to compare responses of adult-born GC elicited by laser stimulation of Chr2-PVs versus electrical stimulation in the OML. (B) IPSCs elicited by laser pulses (0.2 ms, blue mark) and by electrical stimulation in the OML. All responses were blocked by PTX (100  $\mu$ M). Scale bars, 100 ms, 10 pA. The inset shows normalized IPSCs to highlight the difference in kinetic. (C) Time to peak of evoked responses in mature GCs by laser and OML stimulation. Statistical comparison was done using Mann-Whitney's test, with n=5 neurons (5 slices). (D) I-V curves for responses shown in (B), with reversal potentials indicated by the arrows. (E) Reversal potential for different GC stages. Statistical comparisons were done using Kruskal-Wallis' test followed by *post hoc* Dunn's multiple comparisons against mature GCs with laser stimulation. N=6 to 18 cells. (F) Experimental scheme of laser-mediated stimulation of Chr2-SSTs to assess their subcellular target location. (G) IPSCs elicited by single laser pulses. Recordings performed at -50 mV show bi-phasic currents corresponding to proximal (early onset) and distal (delayed) components. Scale bars, 20 ms, 20 pA. (H) I-V curves for both responses shown in (G). Reversal potentials are indicated by arrows. Insets show isolated IPSCs recorded at the reversal potential of the other component. Scale bars, 10 ms, 20 pA. (I) Reversal potentials for different GC ages. N = 6-8 cells (IPSC-distal) and 5-12 cells (IPSC-proximal). Statistical comparisons were done using Kruskal-Wallis test followed by *post hoc* Dunn's multiple comparisons against mature GCs.  $p < 0.05$  (\*) and  $p < 0.01$  (\*\*).

**Figure 3. Short-term plasticity of IPSCs.** (A) Experimental scheme for recording postsynaptic responses elicited by repetitive stimulation of PV-INs (5 pulses, 0.2 ms, 20 Hz). (B) IPSCs recorded from GCs at different ages in response to trains delivered at 0.07 Hz (blue marks). Traces depict all sweeps (gray) and their average (black). Scale bars, 50 ms, 20 pA. (C) IPSC charge for individual pulses of the train (P1-P5), recorded in mature GCs. (D) IPSC charge for pulses 4 and 5 (P4-5) normalized to the charge in the first

pulse, for the indicated ages of postsynaptic GCs. (E-H) Proximal postsynaptic responses elicited by repetitive stimulation of SST-INs (GC  $V_{\text{holding}} = -70$  mV). (I-L) Distal responses elicited by repetitive stimulation of SST-INs (GC  $V_{\text{holding}} = -30$  mV), recorded in the same set of neurons shown in (E-H). Statistical comparisons were done using one-way ANOVA followed by *post hoc* Bonferroni's test for multiple comparisons against the mature group. Sample sizes (presented as GCs/mice): 8-41/4-20 for PV-INs; 6-11/2-5 for SST-INs, with  $p < 0.01$  (\*\*), and  $p < 0.001$  (\*\*\*)).

**Figure 4. PV-INs and SST-INs control GCL spiking.** (A) Experimental design for field potential recordings. The example trace on the right illustrates fEPSP changes elicited by activation of mPP fibers combined with laser activation of Chr2-expressing INs with variable delays ( $\Delta T$ ). The shaded area is proportional to the number of spiking neurons in the GCL (pop-spike). (B) Activation of Chr2-PVs with increasing laser power intensity ( $\Delta T = -5$  ms) abolishes pop-spikes triggered by mPP stimulation. Scale bars: 0.2 mV, 2 ms. (C) Subsequent fEPSP recordings for progressive delays (from -50 to +10 ms) between mPP stimulation and laser activation of Chr2-PVs (left) or Chr2-SSTs (right). Scale bars, 10 ms, 1 mV. (D) Pop-spike areas produced by low frequency stimulation (0.07 Hz) of mPP alone (white columns) or paired with preceding laser pulses ( $\Delta T = -5$  ms; blue bars). Colored circles represent mean values. (E) Laser-induced change of field responses defined as  $100 * (fEPSP_{\text{mPP}} - fEPSP_{\text{mPP+laser}}) / fEPSP_{\text{mPP}}$ . Data obtained from 7 slices/6 animals (PV-INs) and 6 slices/3 animals (SST-INs). (F) Pop-spike change by optogenetic activation of the indicated INs paired simultaneously to electrical stimulation ( $\Delta T = 0$ ). Hollow circles correspond to example traces indicated by # in (C). Statistical comparisons were done using Mann-Whitney's test, with  $p < 0.01$  (\*\*).

**Figure 5. Short-term plasticity of EPSCs evoked by new GCs onto PV-INs and SST-INs.** (A) Confocal image of a 60  $\mu\text{m}$ -thick hippocampal section depicting PV-INs (red) and 6-week-old GCs expressing GFP-ChR2

(green) in a  $PV^{Cre};CAG^{floxStoptdTom}$  mouse (ML: molecular layer; H: hilus). Scale bar, 100  $\mu m$ . (B) EPSCs obtained from PV-INs evoked by laser stimulation of ChR2-GCs at the indicated ages (5-pulse trains at 0.07 Hz, 1 ms, 20 Hz; blue marks). Traces depict individual sweeps (gray) and their average (black). Scale bars, 50 ms, 50 pA. (C) EPSC charge for individual pulses (P1-P5) delivered to 11-wpi ChR2-GCs. Dots correspond to individual neurons. (D) EPSC charge normalized to the fifth pulse (P5). (E) Proportion of INs that displayed EPSC upon activation of new GCs by single pulses or trains, at the indicated ages. Given the short-term facilitation of this synapse, in some cases the EPSC was elicited by train stimulation but not by single pulses. Total numbers of recorded PV-INs are shown on top of each column ( $n = 5$  to 9 mice). Responsive INs to different protocols are displayed inside the columns. (F) Confocal image depicting SST-INs (red) and 6-week-old GCs expressing GFP-ChR2 (green) in a  $SST^{Cre};CAG^{floxStoptdTom}$  mouse. Scale bar, 100  $\mu m$ . (G) EPSCs obtained from SST-INs evoked by laser stimulation of ChR2-GCs at the indicated ages. Traces depict individual sweeps (gray) and their average (black). Recordings were done as described in (B). Scale bars, 50 ms, 50 pA. (H) EPSC charge for individual pulses delivered to 11-wpi ChR2-GCs. (I) EPSC charge normalized to P5. (J) Proportion of INs that displayed EPSC upon activation of new GCs at the indicated ages ( $n = 2$  to 7 mice). Statistical comparisons were done using 2-way ANOVA test followed by *post hoc* Tukey's (D, I), and Fisher's exact test against the 11 wpi group (E,J), with  $p < 0.05$  (\*),  $p < 0.01$  (\*\*), and  $p < 0.001$  (\*\*\*)).

**Figure 6. Differential recruitment of PV-INs and SST-INs by local excitatory networks.** (A) Experimental scheme: simultaneous recordings of fEPSP in the GCL and membrane potential in PV-INs were carried out in response to mPP stimulation. (B) Example fEPSP (top) and whole-cell recordings in a PV-IN (middle), together with measurements of time to peak for spikes. Scale bars, 2 ms, 1 mV (top), 20 mV (bottom). (C) Delay to spike for all individual experiments.  $N=8$  PV-INs, 7 slices, 5 mice. Statistical comparisons were

done using Friedman test followed by Wilcoxon matched-pairs signed rank test, with  $p < 0.05$  (\*). (D) DCG-IV (green trace) prevents GCs pop spike and, consequently, the second PV-IN spike triggered by GC activity (purple). KYN (6 mM) suppressed all spikes (black dotted lines). Scale bars, 2 ms, 0.5 mV (top), 20 mV (bottom). (E) Rate of success to evoke spikes in presence of DCG-IV. Number of cases (positive/total) are shown. Statistical comparisons were done using Fisher's exact test, with  $p < 0.01$  (\*\*). (F) Experimental scheme. (G) Example fEPSP (top) and loose patch recording in a SST-IN (bottom), together with measurements of time to peak for spikes. Scale bars, 2 ms, 1 mV (top), 100 pA (middle). (H) Delay to spike for all individual experiments N=12 SST-INs, 10 slices, 10 mice. Statistical comparison was done using Wilcoxon matched-pairs signed rank test, with  $p < 0.01$  (\*\*).

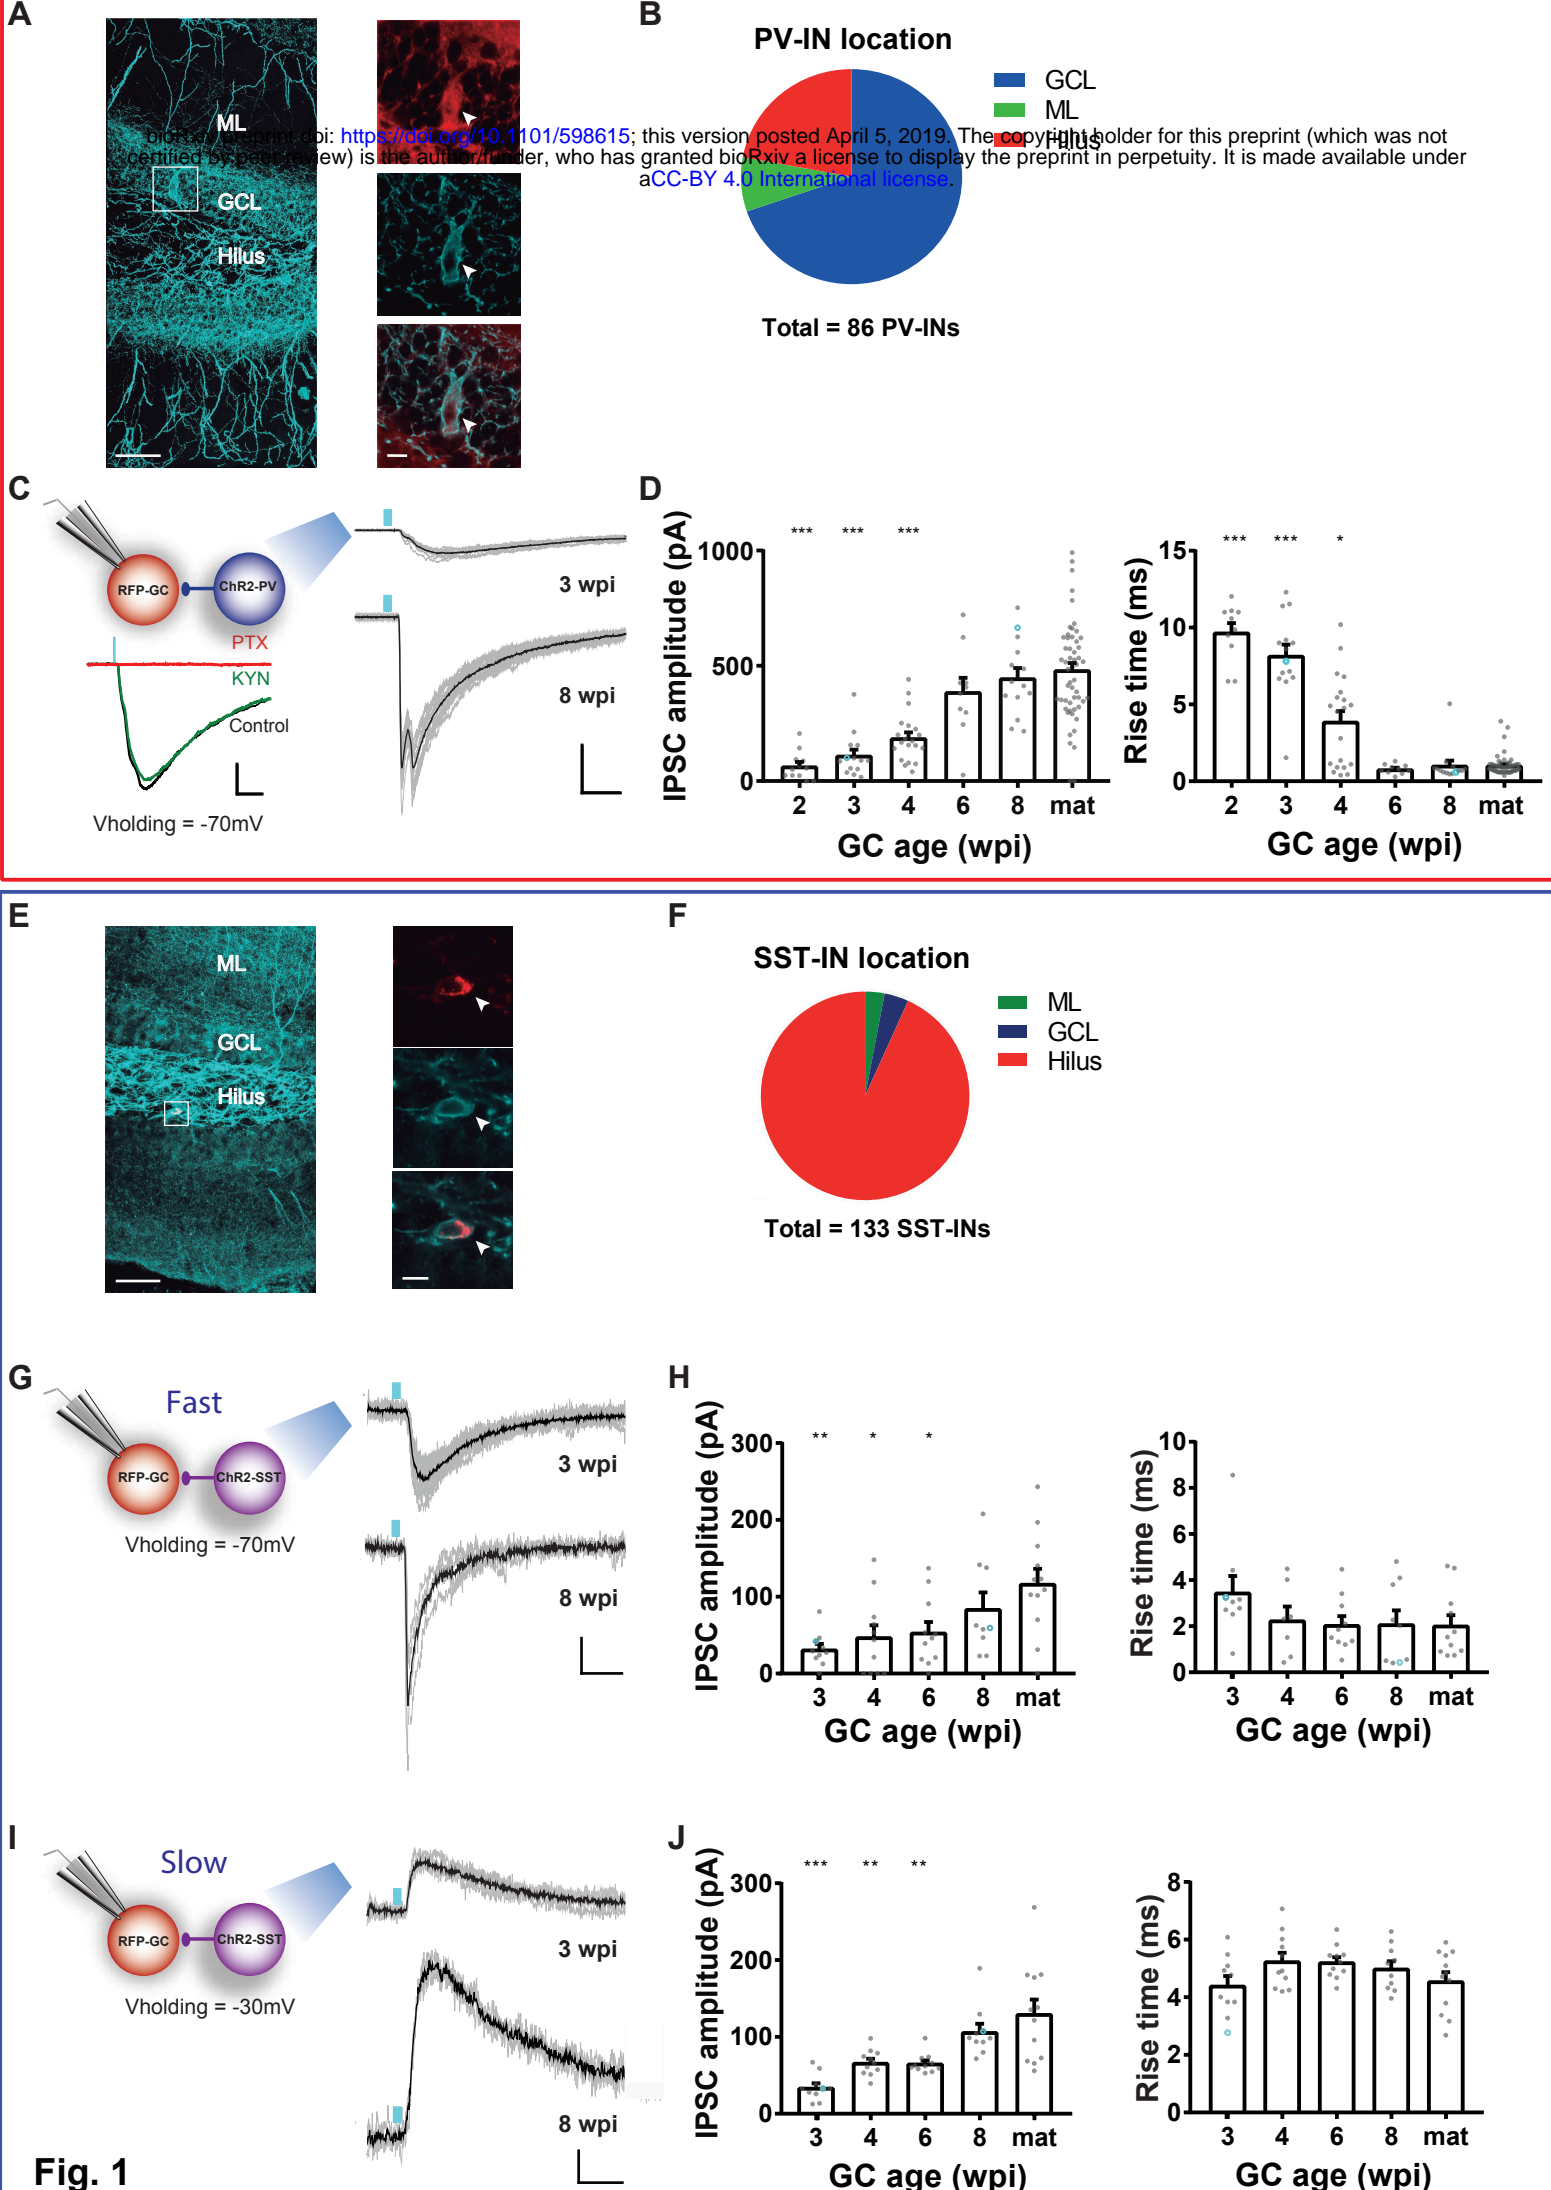



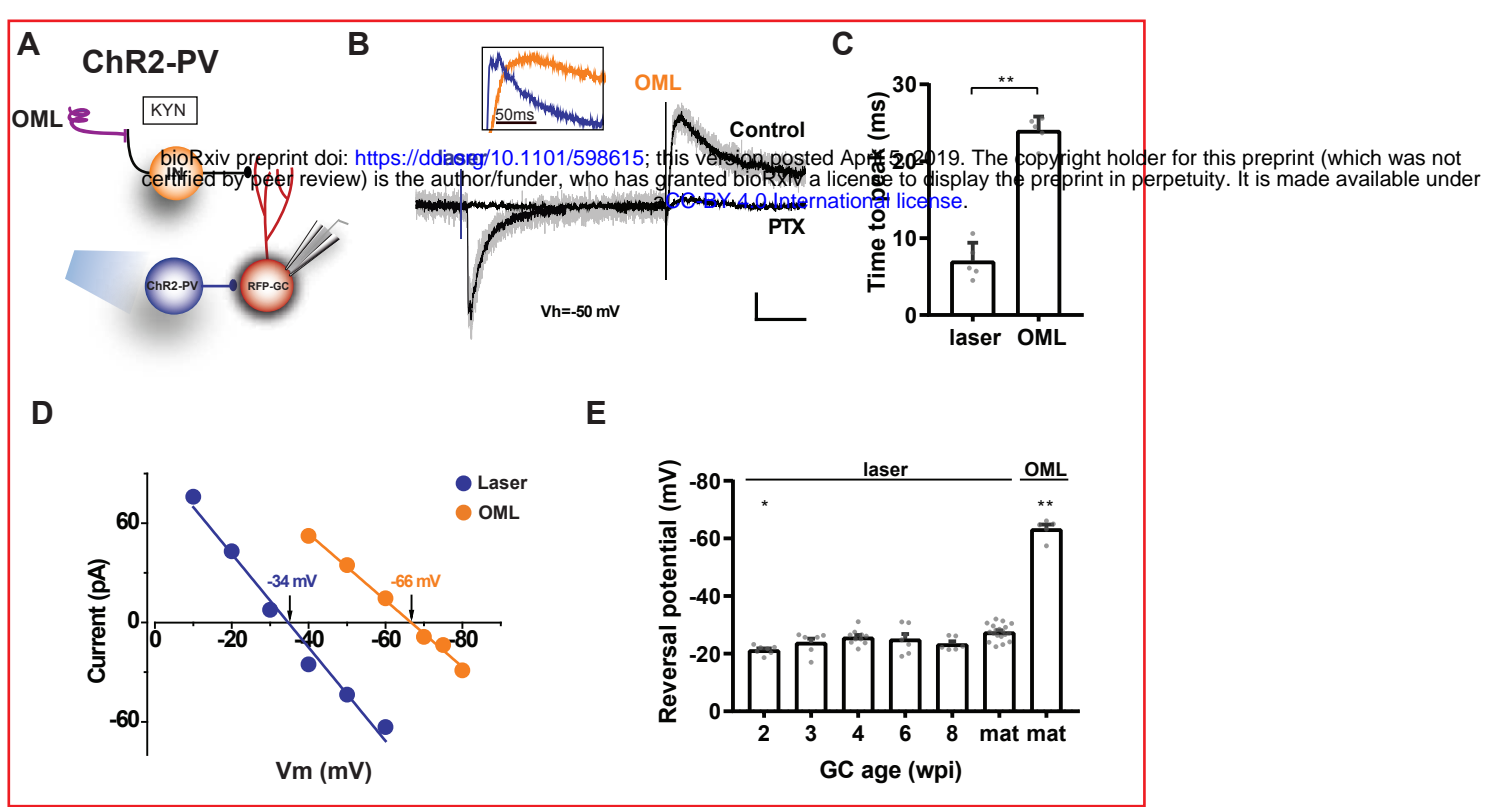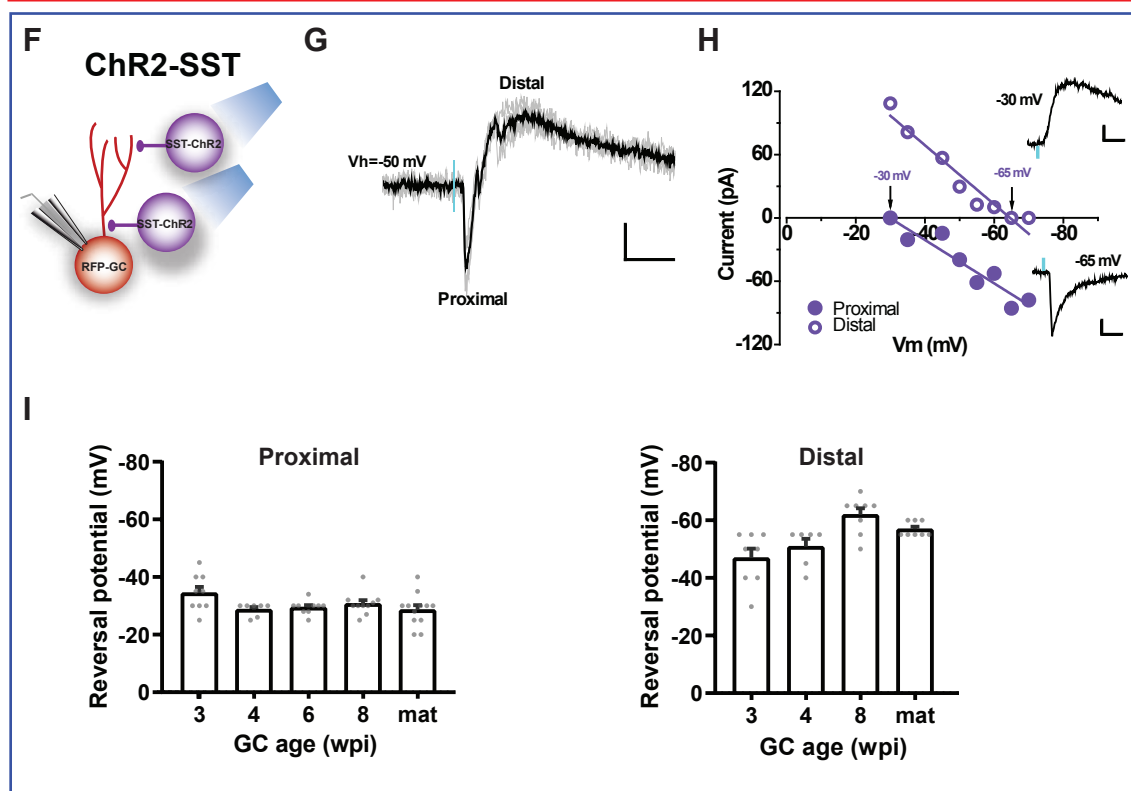

Fig. 2

**ChR2-PV****A**

bioRxiv preprint doi: <https://doi.org/10.1101/598615>; this version posted April 5, 2019. The copyright holder for this preprint (which was not certified by peer review) is the author/funder, who has granted bioRxiv a license to display the preprint in perpetuity. It is made available under aCC-BY 4.0 International license.

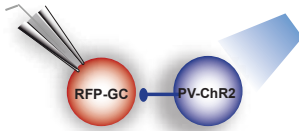

20 Hz

**B**

3 wpi

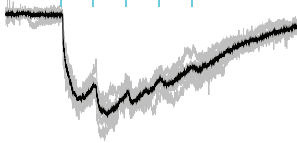

mature

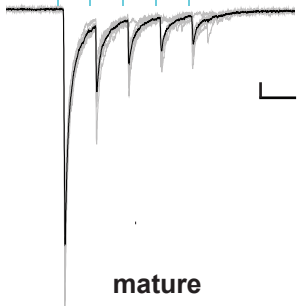**C**

IPSC charge (pA\*50ms)

mature

P1 P2 P3 P4 P5

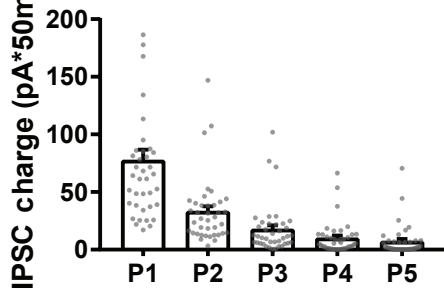**D**

IPSC charge P4-5/P1

GC age (wpi)

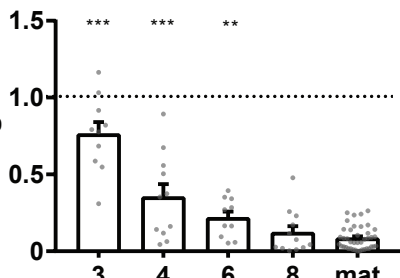**ChR2-SST; proximal****E**

bioRxiv preprint doi: <https://doi.org/10.1101/598615>; this version posted April 5, 2019. The copyright holder for this preprint (which was not certified by peer review) is the author/funder, who has granted bioRxiv a license to display the preprint in perpetuity. It is made available under aCC-BY 4.0 International license.

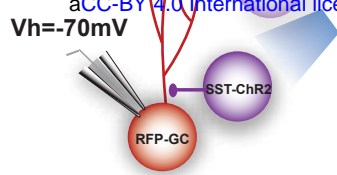

20 Hz

**F**

3 wpi

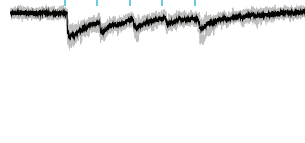

mature

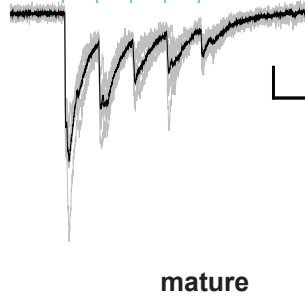**G**

IPSC charge (pA\*50ms)

mature

P1 P2 P3 P4 P5

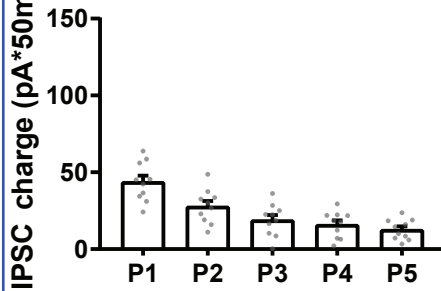**H**

IPSC charge P4-5/P1

GC age (wpi)

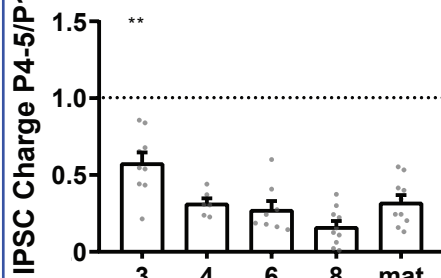**ChR2-SST; distal****I**

bioRxiv preprint doi: <https://doi.org/10.1101/598615>; this version posted April 5, 2019. The copyright holder for this preprint (which was not certified by peer review) is the author/funder, who has granted bioRxiv a license to display the preprint in perpetuity. It is made available under aCC-BY 4.0 International license.

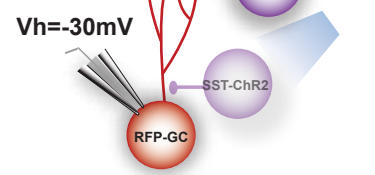

20 Hz

**J**

3 wpi

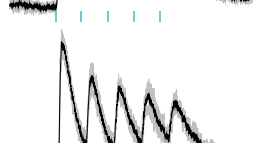

mature

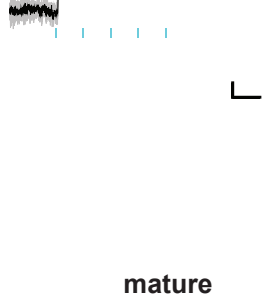**K**

IPSC charge (pA\*50ms)

mature

P1 P2 P3 P4 P5

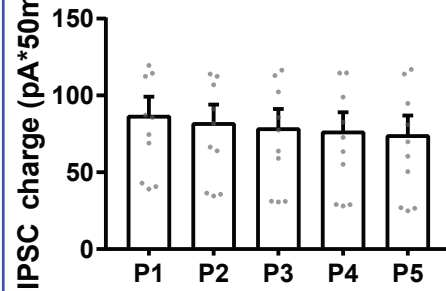**L**

IPSC charge P4-5/P1

GC age (wpi)

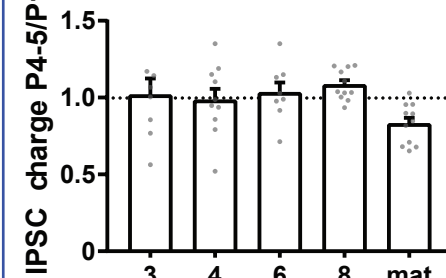**Fig. 3**

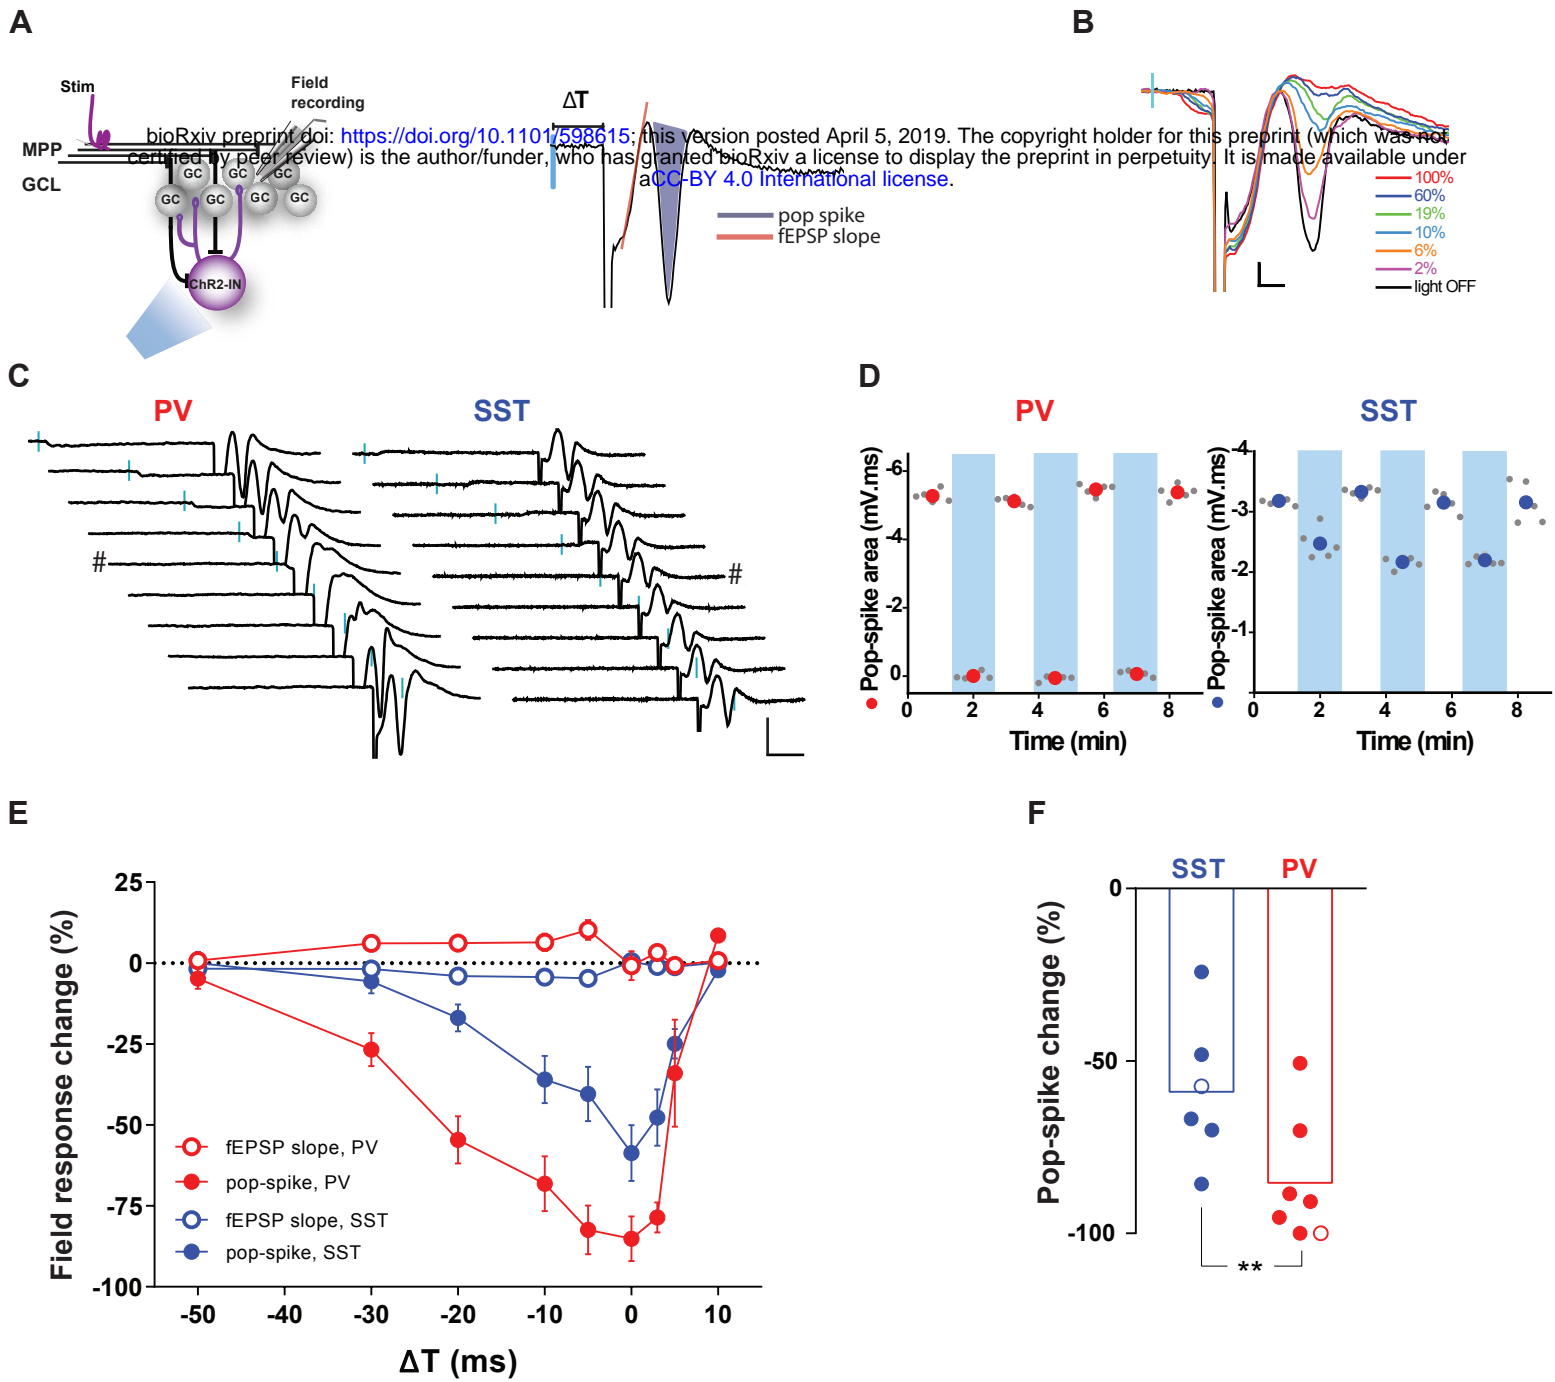

Fig. 4

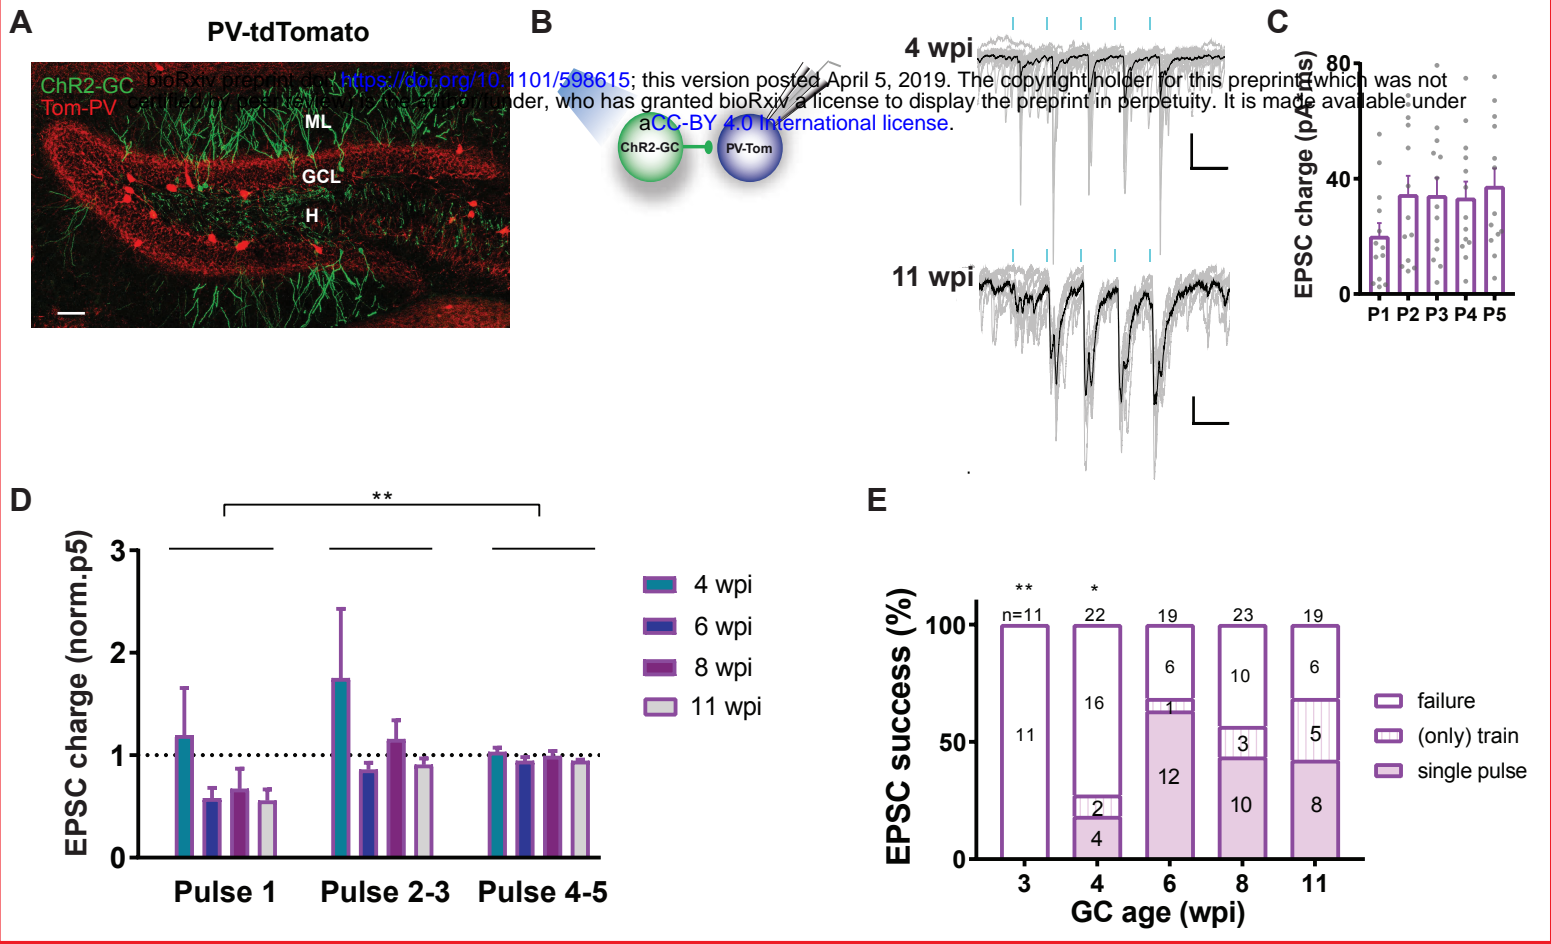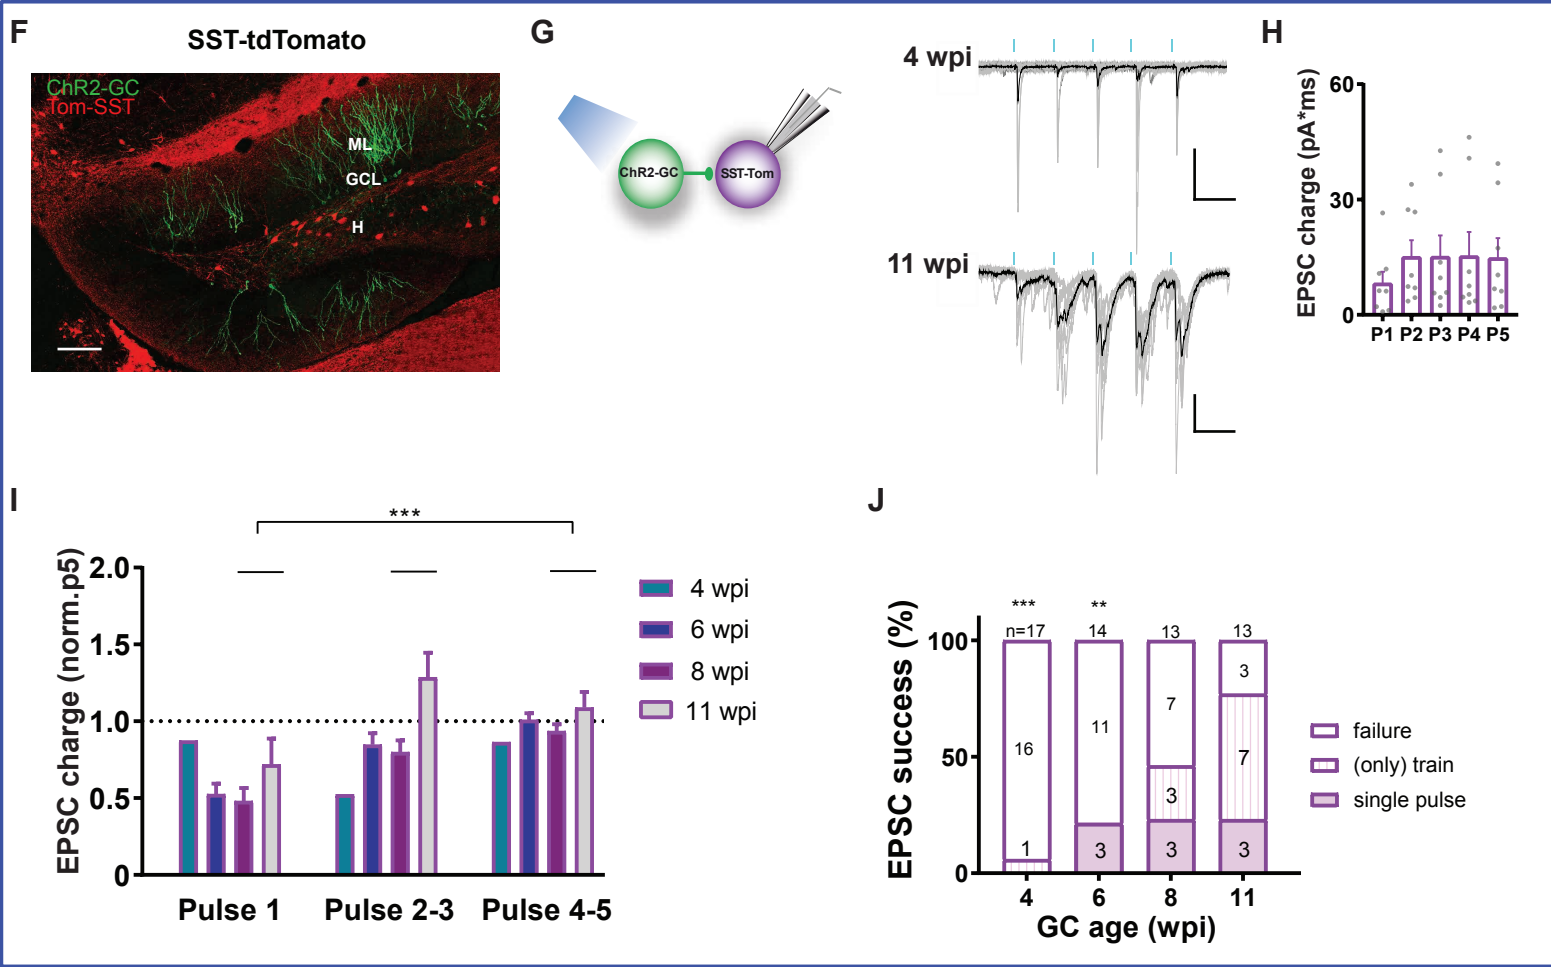

**Fig. 5**

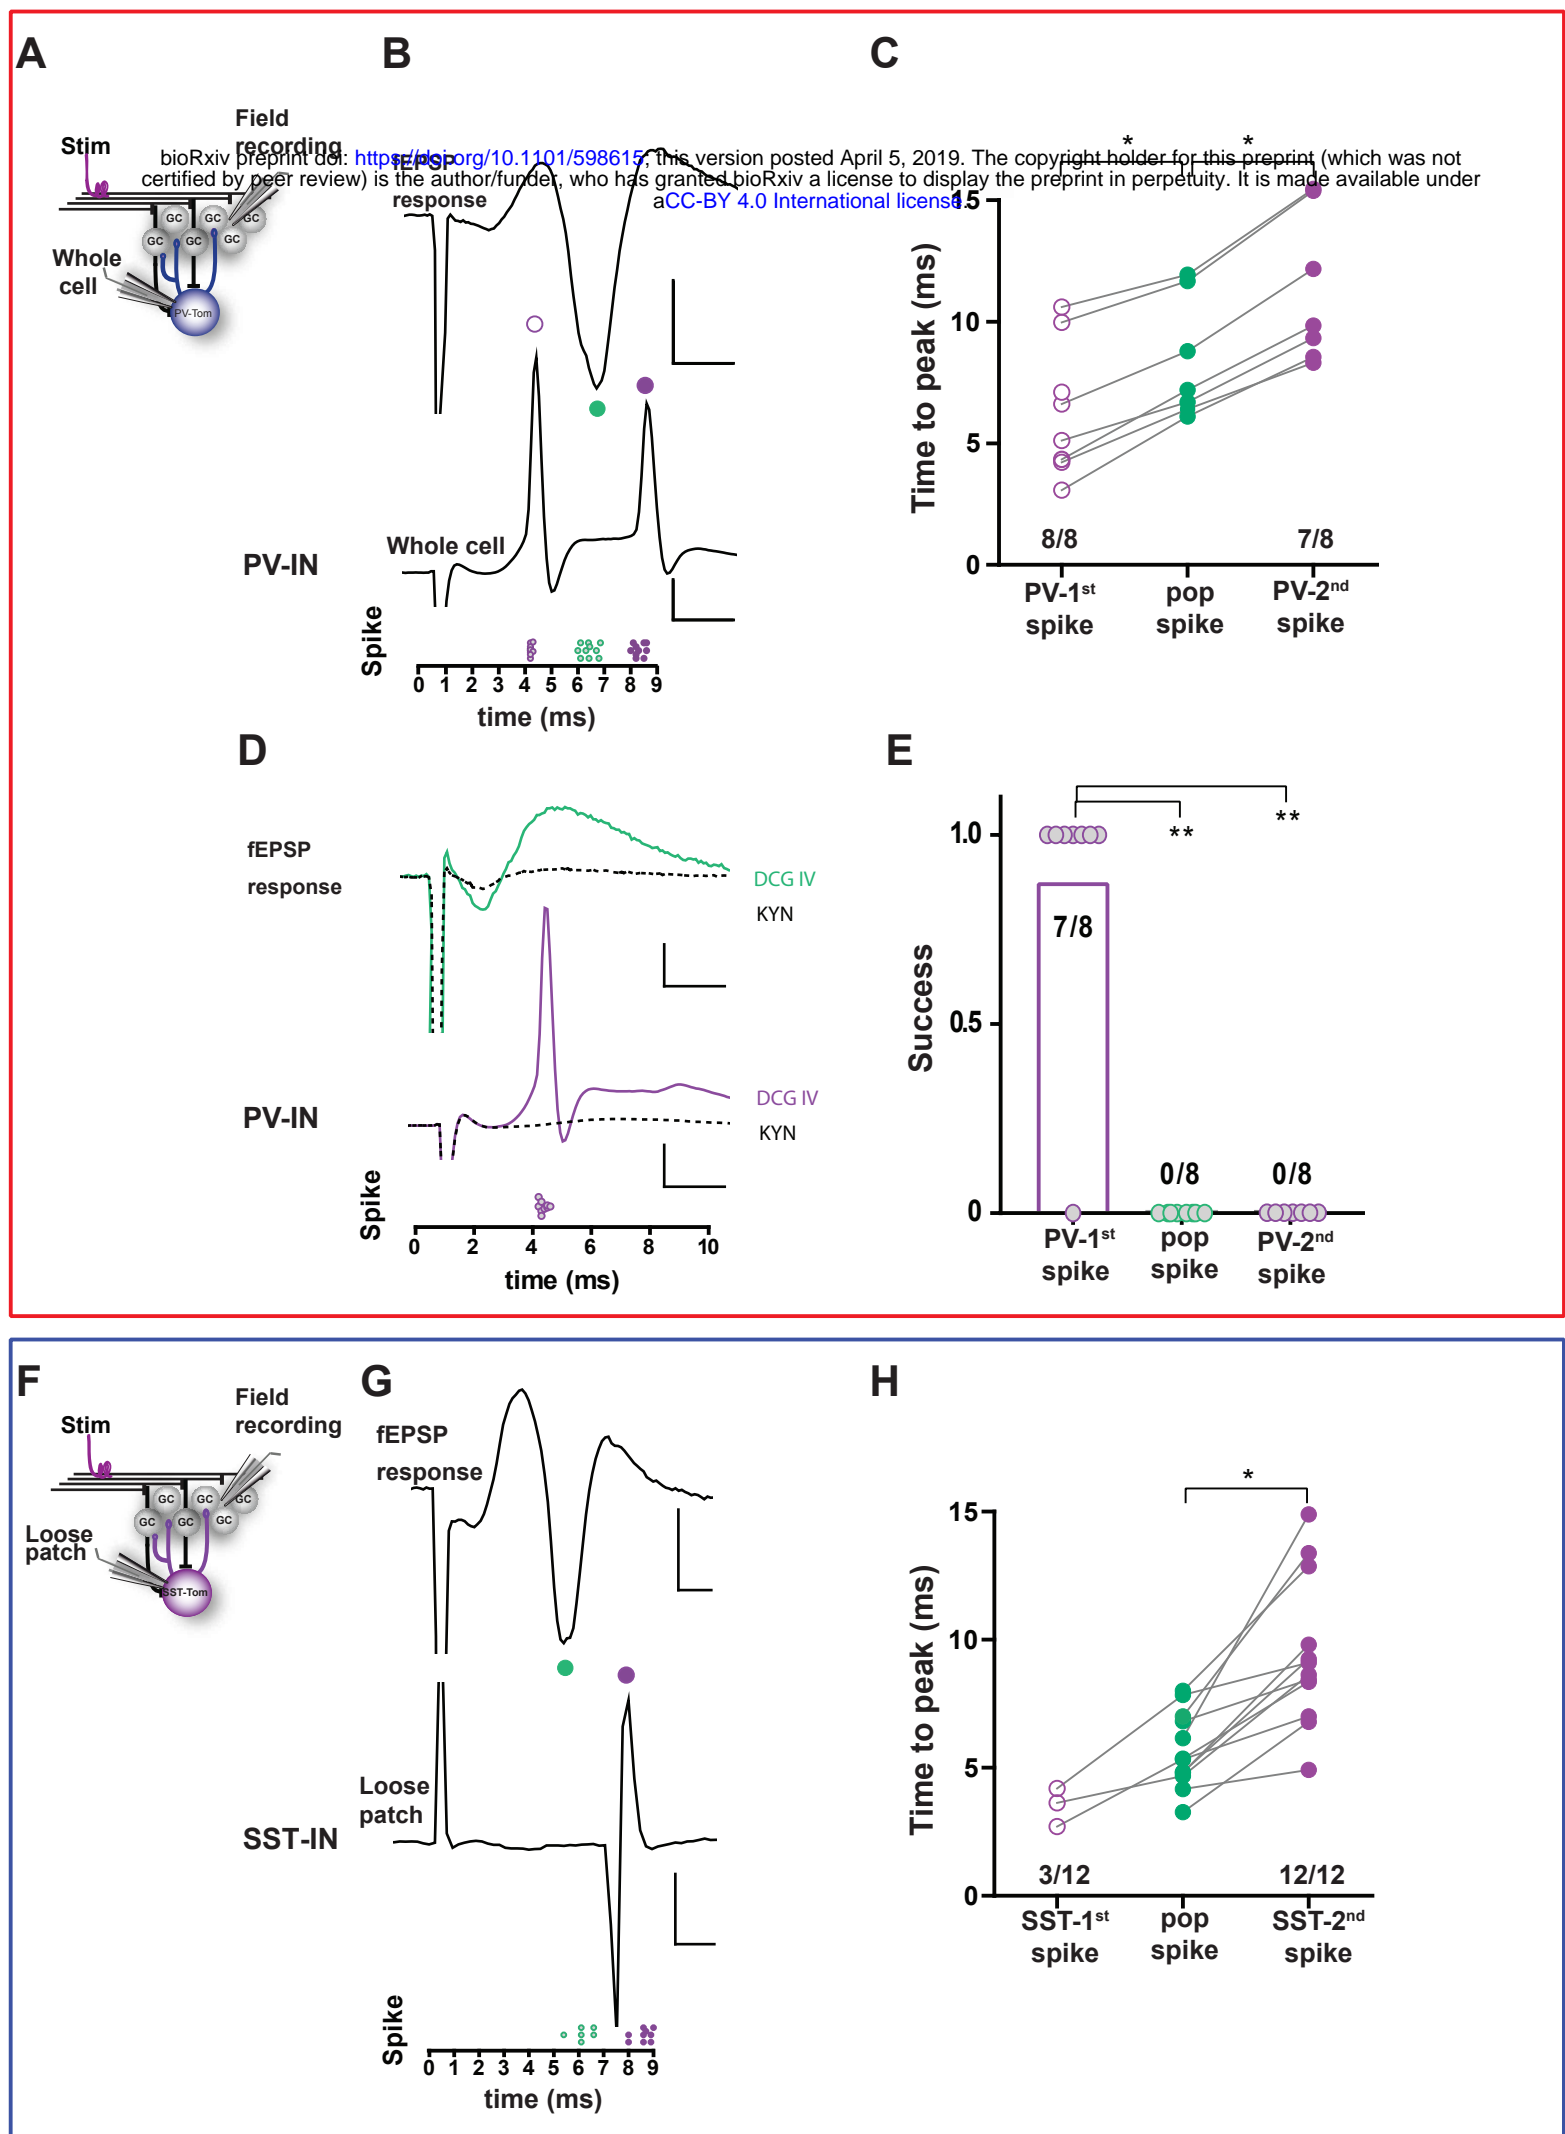

Fig. 6
